# Supplementary material for: Nesting complexation of C60 with large, rigid D2 symmetrical macrocycles
Source: Royal Society of Chemistry journal article supplement (doi:10.1039/c004379f), 2010-01-01
Supplement: c004379f.pdf [file c004379f.pdf]

**Supporting Information for:**

**Nesting Complexation of C<sub>60</sub> with Large, Rigid D<sub>2</sub> Symmetrical  
Macrocycles**

Marco Caricato,<sup>a</sup> Carmine Coluccini,<sup>a</sup> Daniele Dondi,<sup>b</sup> Douglas Vander Griend,<sup>c</sup> and  
Dario Pasini,<sup>\*a</sup>

*a) Department of Organic Chemistry, University of Pavia, Viale Taramelli, 10 – 27100 – Pavia, Italy.*

*Fax: 39 0382 987323; Tel: 39 0382 987835; E-mail: [dario.pasini@unipv.it](mailto:dario.pasini@unipv.it)*

*b) Department of General Chemistry, University of Pavia, Viale Taramelli 12 – 27100 – Pavia, Italy.*

*c) Department of Chemistry & Biochemistry, Calvin College, Grand Rapids – MI 49546-4403 – USA.*

*Contents:*

Additional NMR and UV/Vis spectra (pages S2-S10)

Minimized conformation of macrocycles (page S11)

Copies of <sup>1</sup>H NMR, <sup>13</sup>C NMR and mass spectra (pages S12-S28)

Additional details on calculations (page S29-S48)

**Figure S1.**  $^1\text{H}$  NMR spectra ( $\text{CDCl}_3$ , 300 MHz, room temperature) of macrocycles a) (*RR*)-**8**; b) (*RR*)-**9**; c) (*RR*)-**10**; d) (*RR*)-**11**.

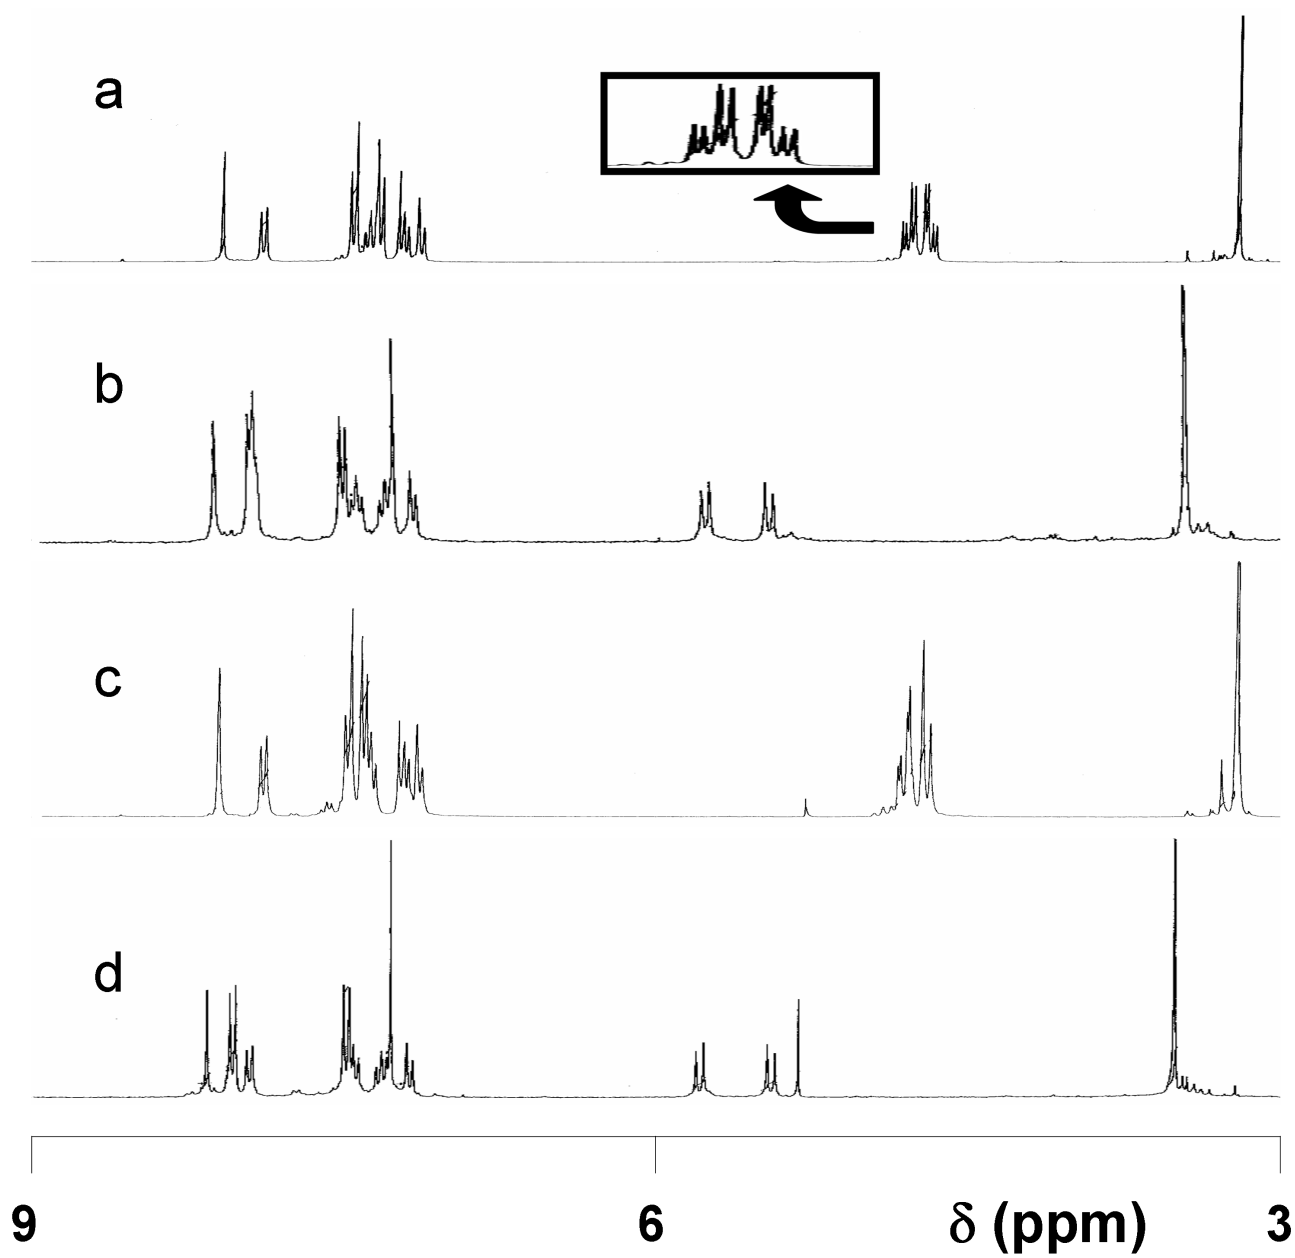

**Table S1.** Selected  $^1\text{H}$  NMR chemical shifts for precursors (*R*)-**4-7** and macrocycles (*RR*)-**8-11**, in  $\text{CDCl}_3$  at room temperature.<sup>[a]</sup>

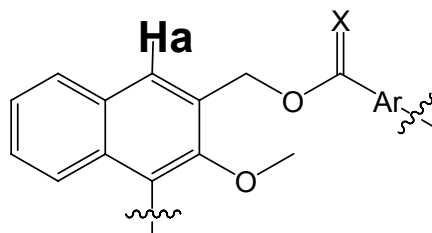

| Compound                              | BINOL-OMe (s) <sup>[b]</sup> | BINOL-Ha (s) <sup>[b]</sup> | Ar-CH <sub>2</sub> O | Binol-CH <sub>2</sub> O |
|---------------------------------------|------------------------------|-----------------------------|----------------------|-------------------------|
| ( <i>R</i> )- <b>1</b> <sup>[c]</sup> | 3.30                         | 8.03                        | -                    | 4.98(dd)                |
| ( <i>R</i> )- <b>4</b>                | 3.31                         | 8.15                        | 4.78(s)              | 4.91(dd)                |
| ( <i>R</i> )- <b>5</b>                | 3.38                         | 8.13                        | -                    | 5.72(dd)                |
| ( <i>R</i> )- <b>6</b>                | 3.38                         | 8.22                        | 4.85(s)              | 4.98(dd)                |
| ( <i>R</i> )- <b>7</b>                | 3.36                         | 8.11                        | -                    | 5.69(dd)                |
| ( <i>RR</i> )- <b>8</b>               | 3.22                         | 8.13                        | 4.68-4.85(m)         | 4.68-4.85(m)            |
| ( <i>RR</i> )- <b>9</b>               | 3.47                         | 8.14                        | -                    | 5.62(dd)                |
| ( <i>RR</i> )- <b>10</b>              | 3.24                         | 8.15                        | 4.72-4.95(m)         | 4.72-4.95(m)            |
| ( <i>RR</i> )- <b>11</b>              | 3.51                         | 8.16                        | -                    | 5.61(dd)                |

[a] Spectra taken at 300 MHz with 5-10 mM sample concentration in  $\text{CDCl}_3$ . [b] Peak multiplicity as follows: s singlet, bs broad singlet, d doublet, m multiplet, dd double doublet (AB system). [c] Data taken from reference 9.

**Figure S2.** Normalized UV/Vis spectra of macrocycles (*RR*)-**8-11** ( $6 \times 10^{-6}$ - $2 \times 10^{-5}$  in EtOH).

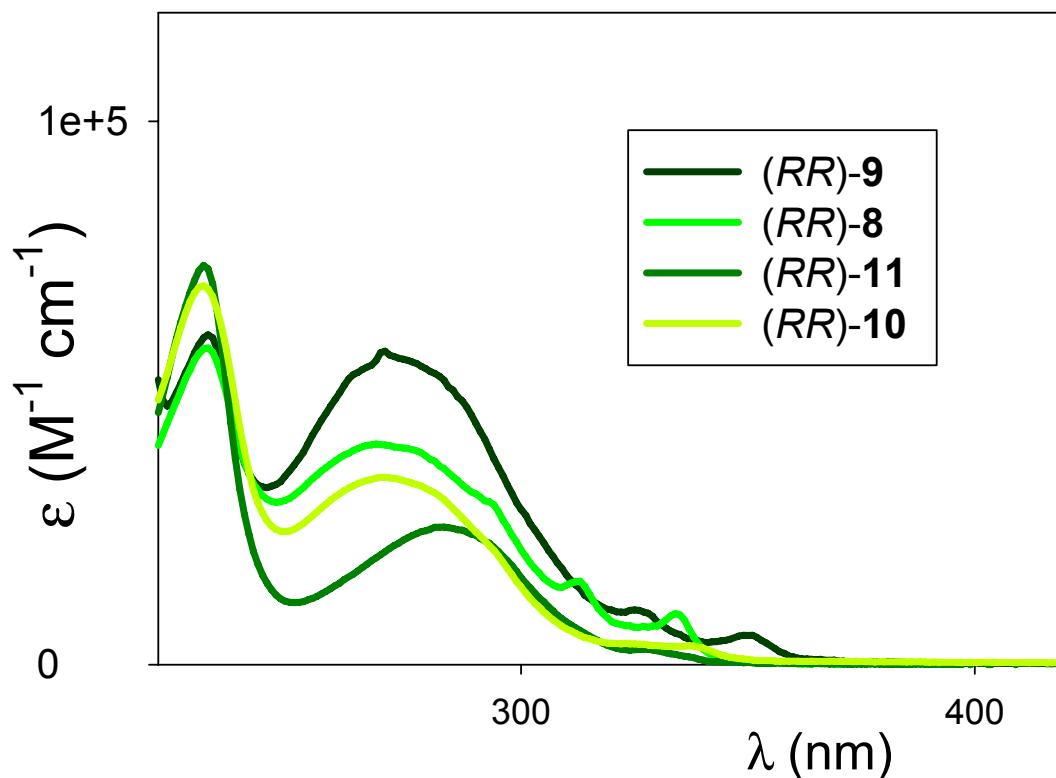

For UV/Vis of molecular fragments of the macrocycles (taken from literature):

- a) 4,4'-dimethylbiphenyl:  $\lambda_{\text{max}}=254 \text{ nm}$  ( $\epsilon=18400$  in petroleum ether)<sup>S1</sup>
- b) 4,4'-dicarboxy dimehtyl ester:  $\lambda_{\text{max}}=280 \text{ nm}$  ( $\epsilon=30000$  in EtOH)<sup>S2</sup>
- c) 1,4-bis(4-carbomethoxyphenyl)buta-1,3-diyne (MeCN):  $\lambda_{\text{max}} (\epsilon \times 10^{-4}) = 284 (0.50), 302 (0.58), 322 (0.78), 345 (0.68)$ .<sup>S3</sup>
- d) 1,4-bis(phenylethynyl)buta-1,3-diyne (MeCN):  $\lambda_{\text{max}} (\epsilon \times 10^{-4}) = 296 (2.16), 305 (3.62), 326 (3.50)$ .<sup>S3</sup>

**Figure S3.** Titration of  $C_{60}$  ( $65 \mu\text{M}$ ) with macrocycle  $(RR)\text{-}8$  ( $0\text{-}485 \mu\text{M}$ ) in toluene at  $25^\circ\text{C}$ .

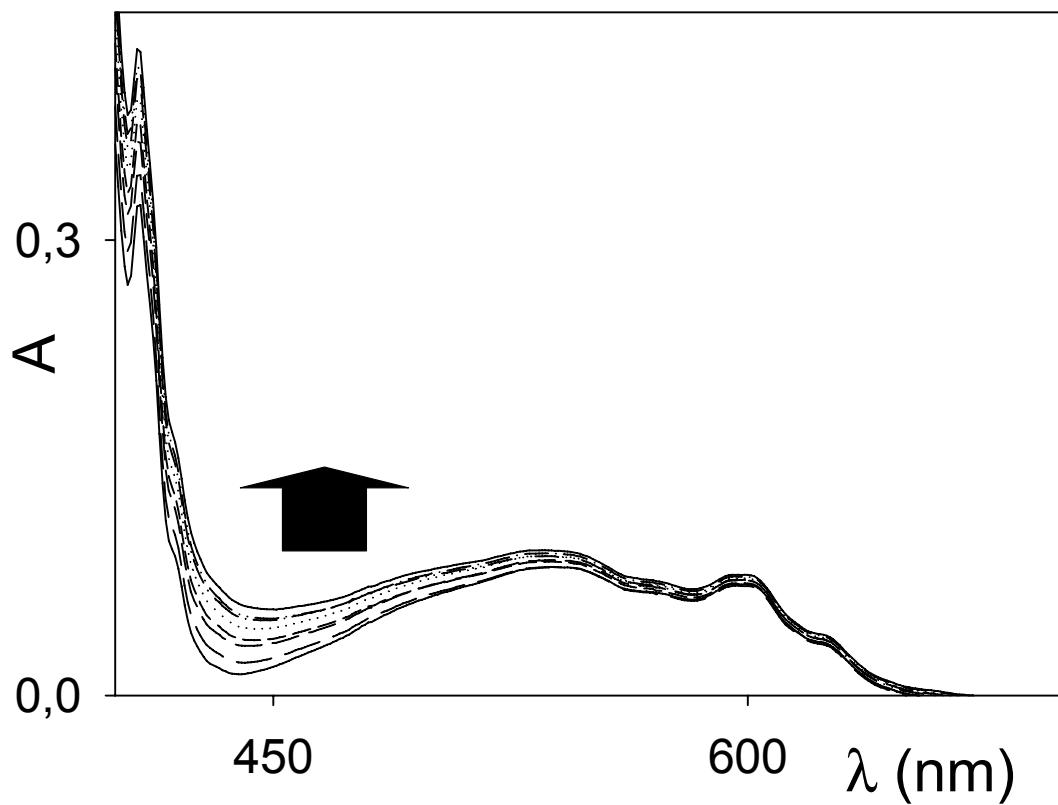

**Figure S4.** Titration of  $C_{60}$  (103  $\mu\text{M}$ ) with macrocycle (*RR*)-**9** (0-500  $\mu\text{M}$ ) in toluene at 25°C.

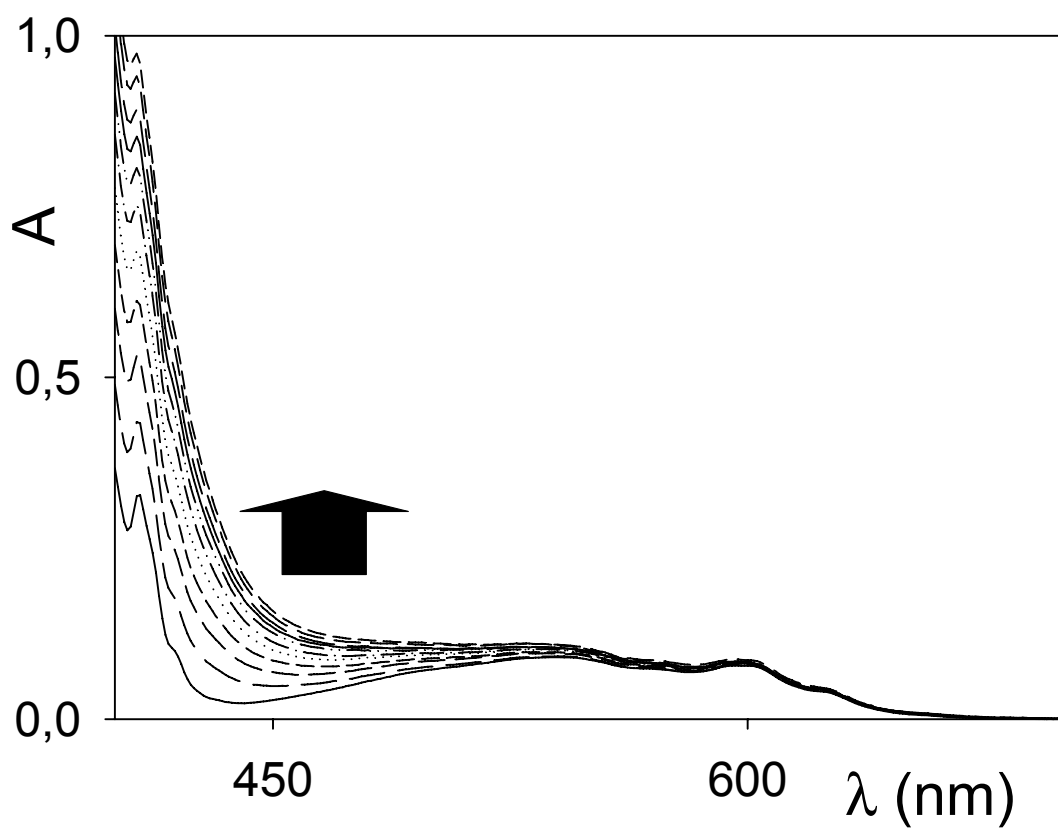

**Figure S5.** Calculated curves for the 1:1 complexes between macrocycles (*RR*)-8, (*RR*)-9 and (*RR*)-11 in toluene at 25°C and related simulated macrocycle absorbance curves.

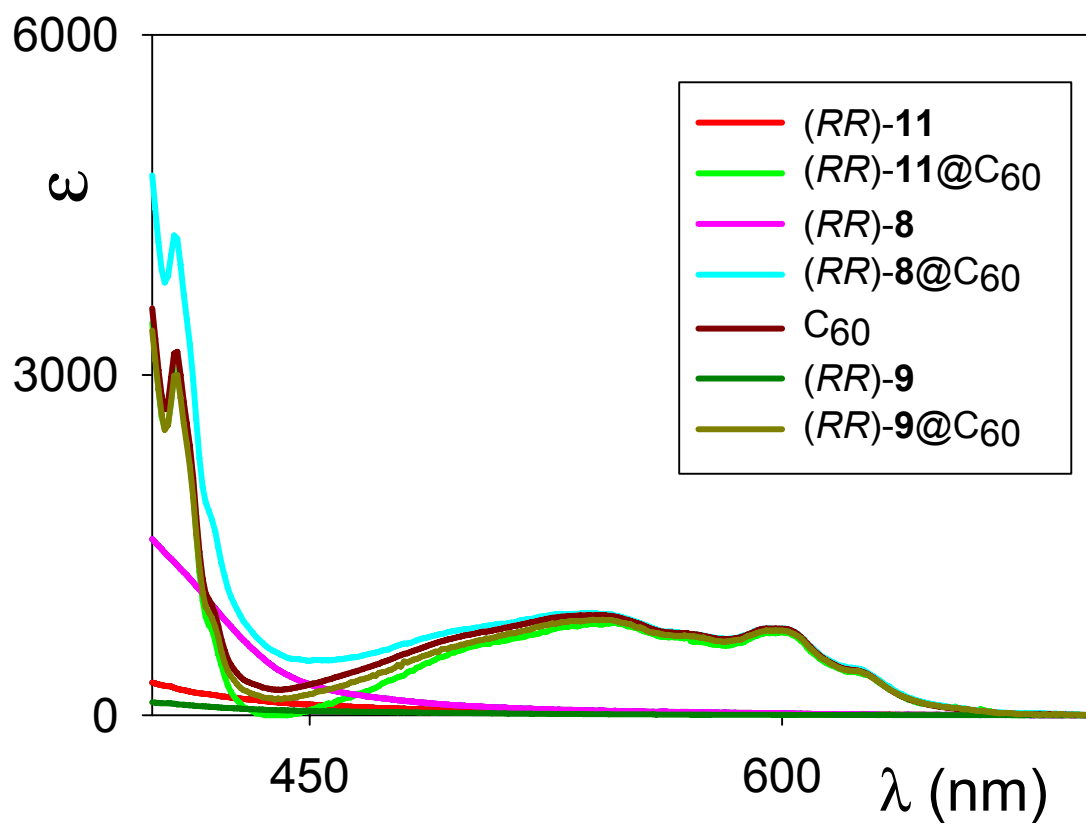

Figure S6. Spectrophotometric Titration of 65  $\mu\text{M}$   $\text{C}_{60}$  with Macrocycle (RR)-8.

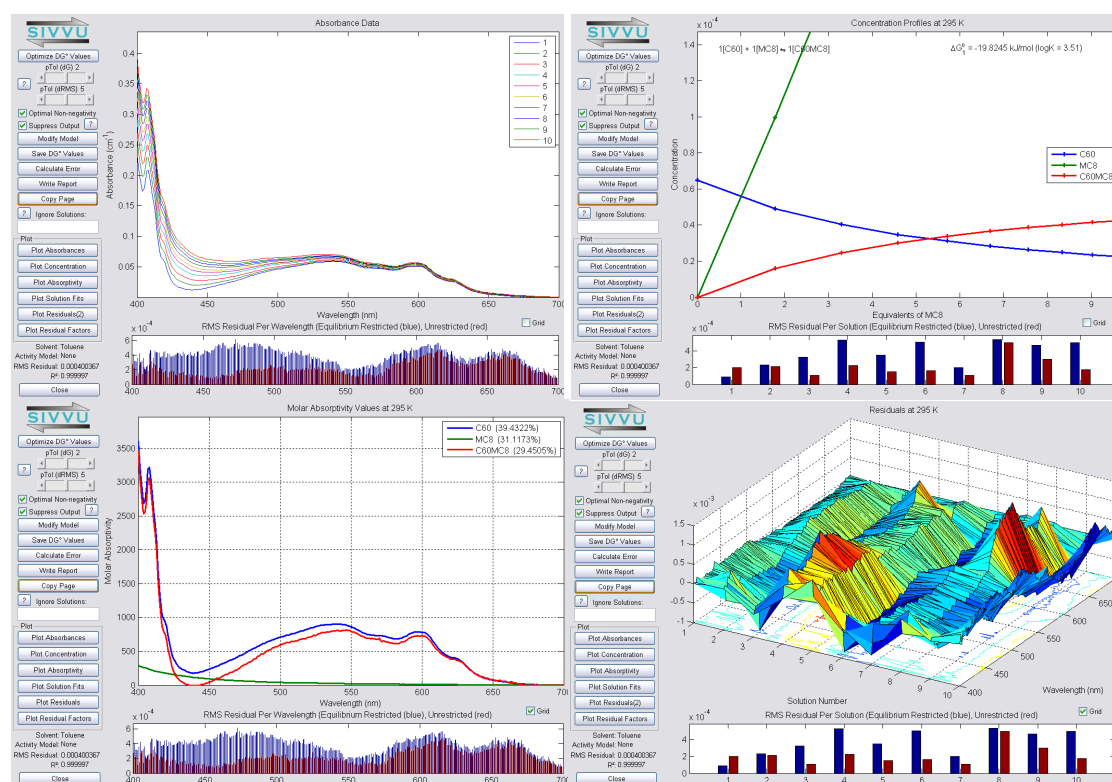

Summary:

Data at 295 K

Non-negativity was enforced with optimization (not truncation).

$\text{DG1} = -19.8245 (\pm 0.0114)$ ; RMS Residual = 0.00040037

Unrestricted RMS Residual (3 mathematical factors): 0.0002411

Restricted Data Reconstruction (3 chemical factors): 99.2892%

Unrestricted Data Reconstruction (3 mathematical factors): 99.3934%

Remaining Imbedded Error in Absorbance Values: 0.0002621

$R^2$ : 99.9997%



**Figure S7.** Spectrophotometric Titration of 103  $\mu\text{M}$   $\text{C}_{60}$  with Macrocycle (*RR*)-9.

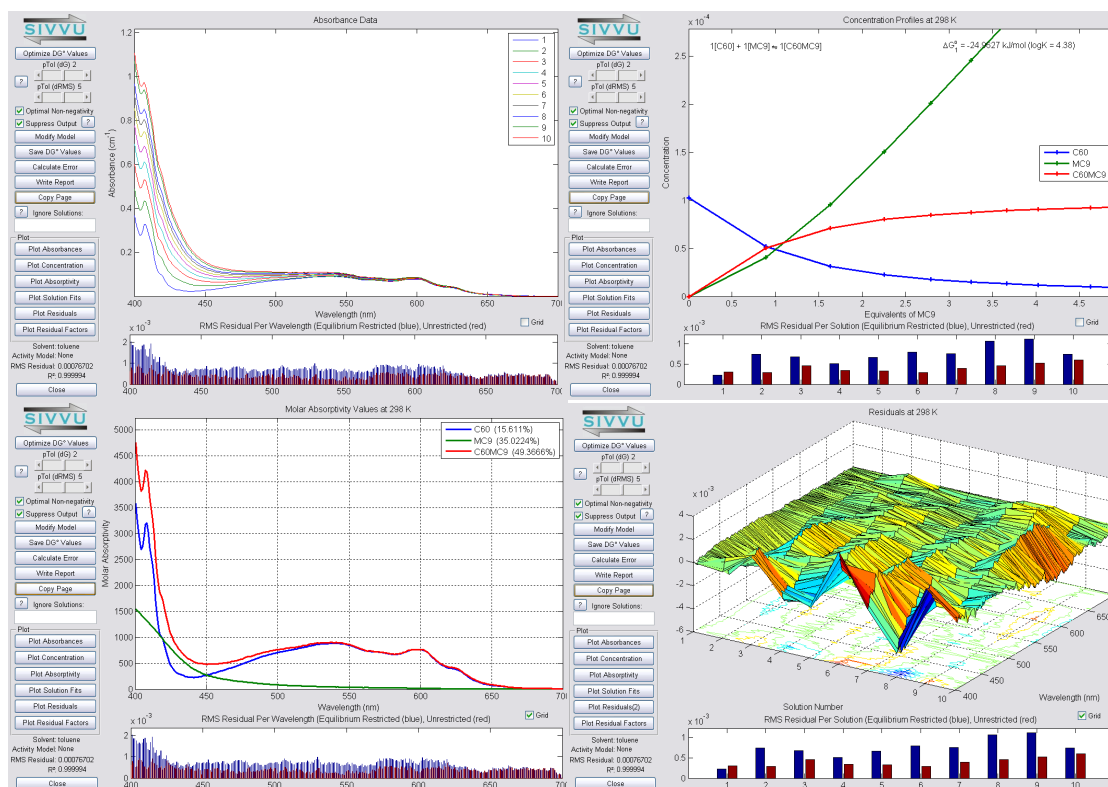

**Summary:**

Data at 298 K

Non-negativity was enforced with optimization (not truncation).

DG1 = -24.9627 ( $\pm 0.0875$ ); RMS Residual = 0.00076702

Unrestricted RMS Residual (3 mathematical factors): 0.00041173

Restricted Data Reconstruction (3 chemical factors): 99.3925%

Unrestricted Data Reconstruction (3 mathematical factors): 99.5166%

Remaining Error Imbedded in Absorbance Values: 0.00050213

R<sup>2</sup>: 99.9994%

**Figure S8.** Spectrophotometric Titration of 69  $\mu\text{M}$   $\text{C}_{60}$  with Macrocycle (*RR*)-11.

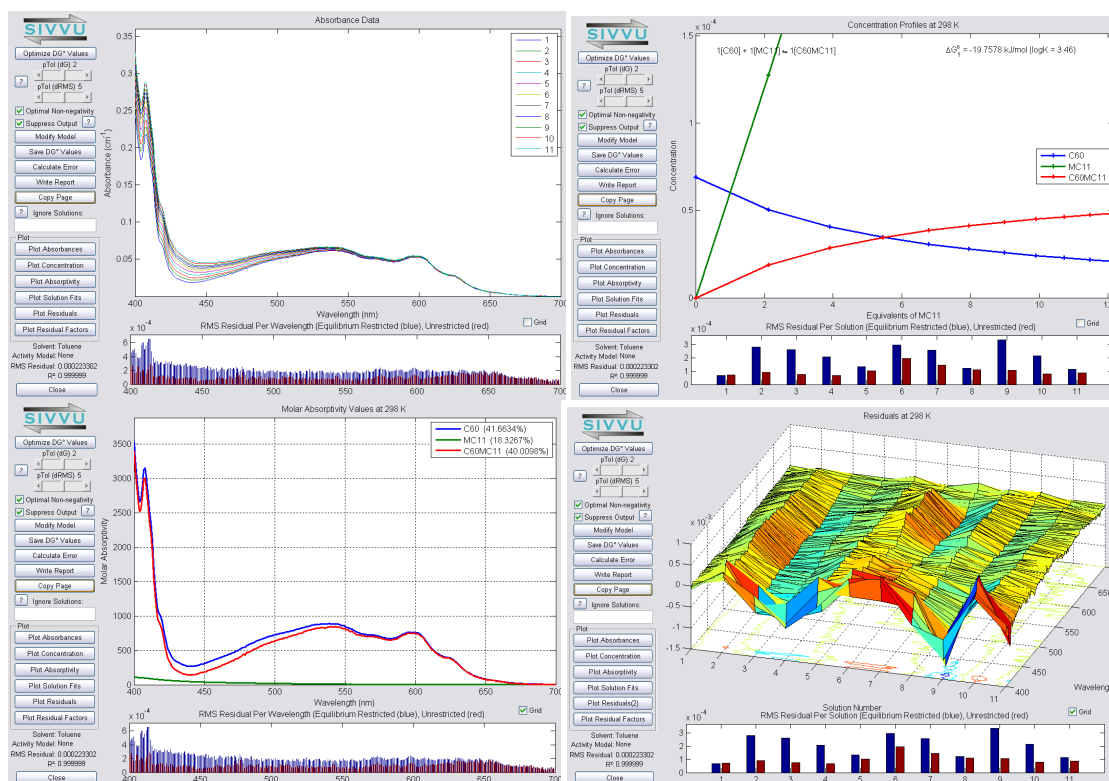

**Summary:**

Data at 298 K

Non-negativity was enforced with optimization (not truncation).

$\text{DG1} = -19.7578 (\pm 0.015)$ ;  $\text{RMS Residual} = 0.0002233$

Unrestricted RMS Residual (3 mathematical factors): 0.00010936

Restricted Data Reconstruction (3 chemical factors): 99.6088%

Unrestricted Data Reconstruction (3 mathematical factors): 99.629%

Remaining Imbedded Error in Absorbance Values: 0.00013674

$\text{R}^2$ : 99.9999%

**Figure S9.** Minimized structures of macrocycles (*RR*)-8, (*RR*)-9, (*RR*)-10 and (*RR*)-11.

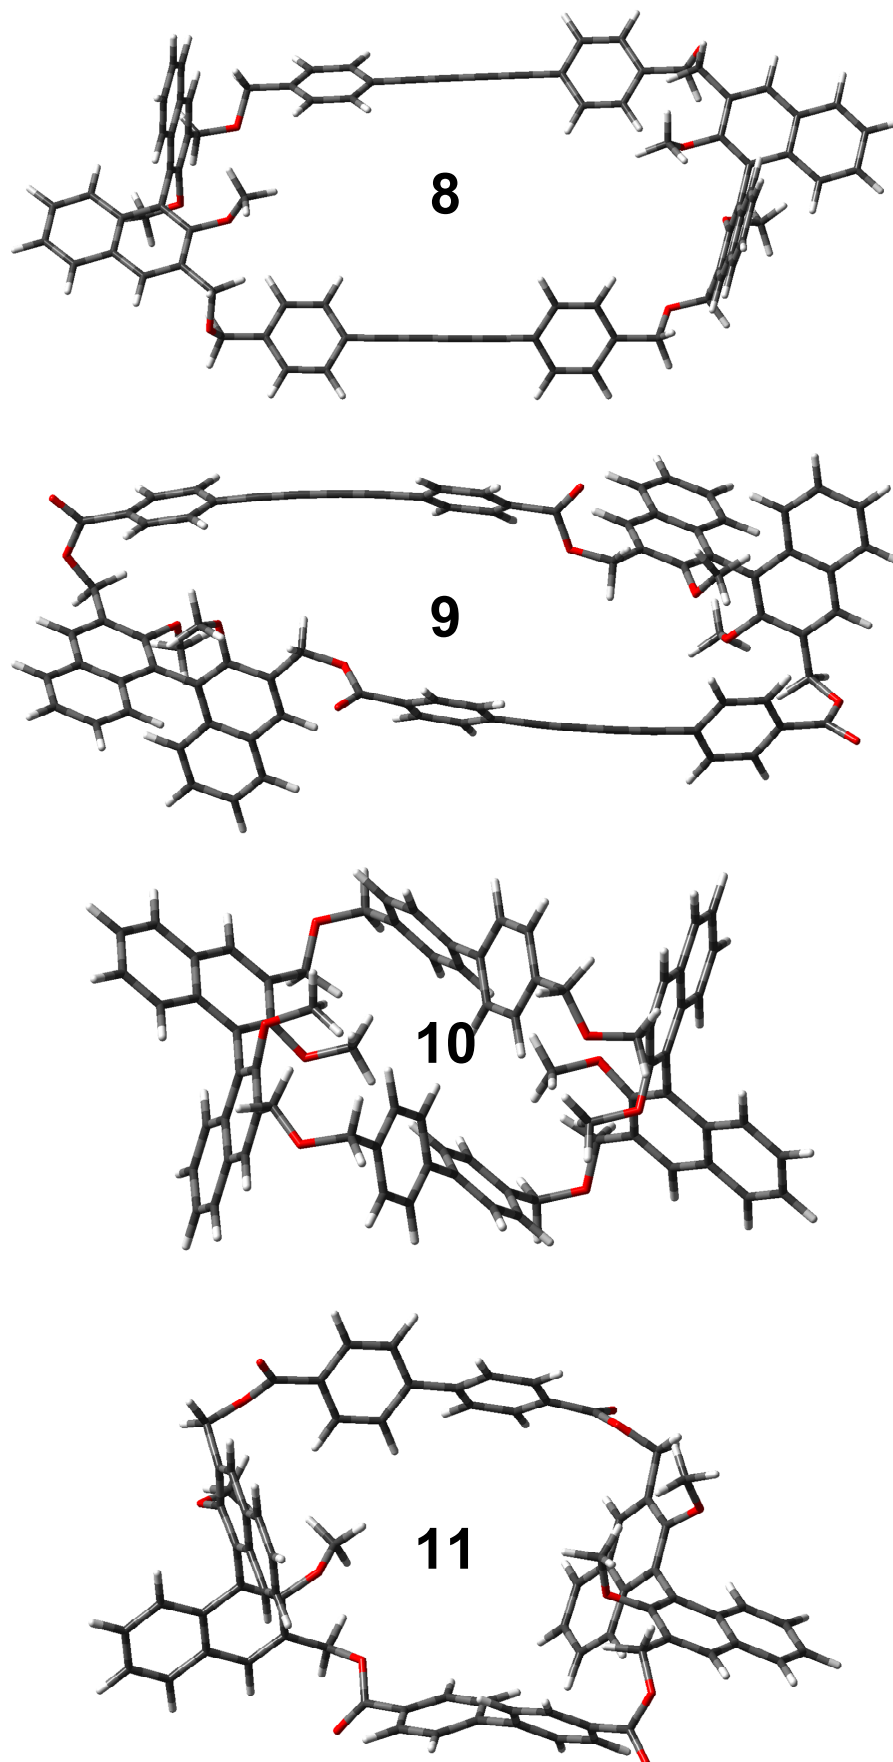

Compound (R)-4.

$^1\text{H}$  NMR ( $\text{CDCl}_3$ , 300 MHz)

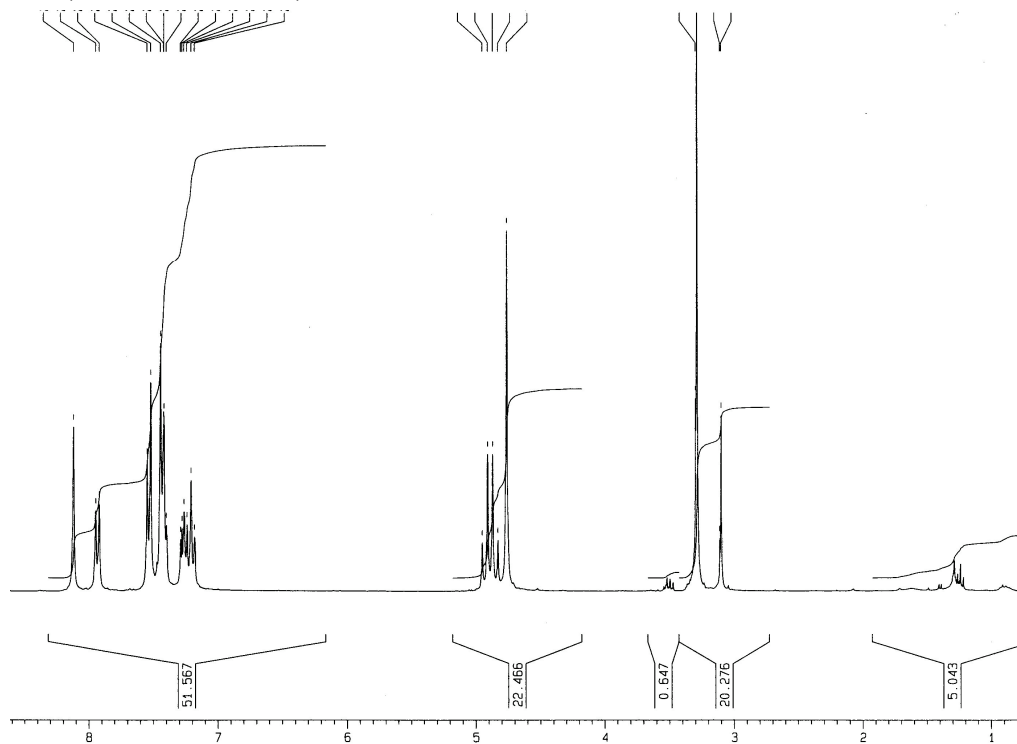

$^{13}\text{C}$  NMR ( $\text{CDCl}_3$ , 75 MHz)

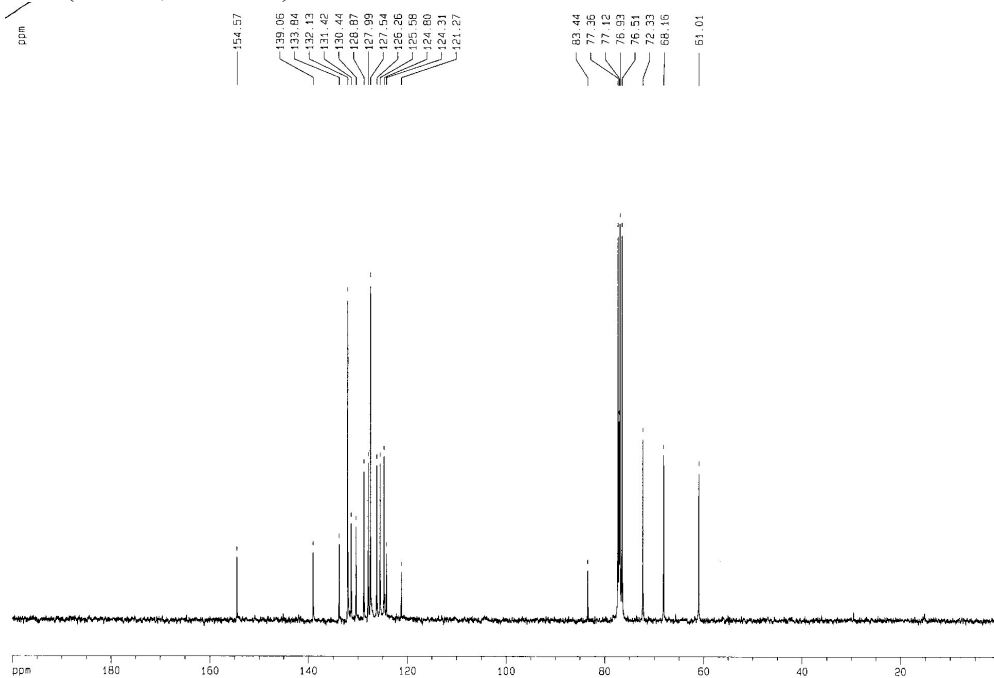

### $^{13}\text{C}$ NMR DEPT (CDCl<sub>3</sub>, 75 MHz)

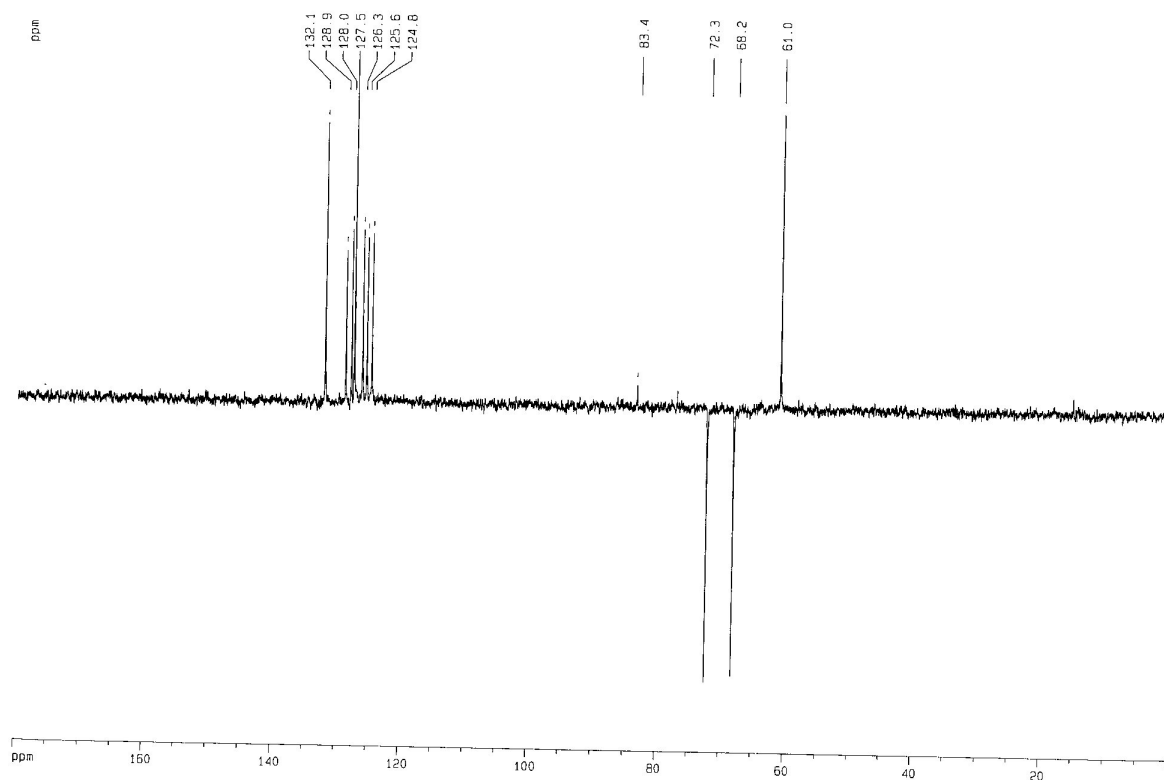

### ESI MS

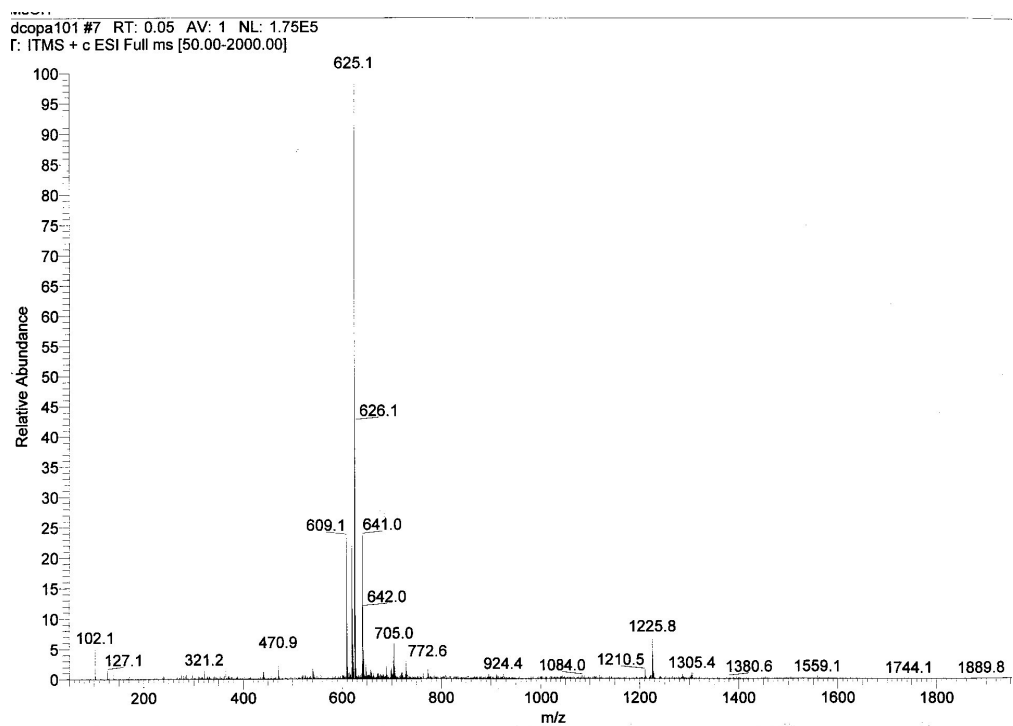

*Compound (R)-5.*

$^1\text{H}$  NMR ( $\text{CDCl}_3$ , 300 MHz)

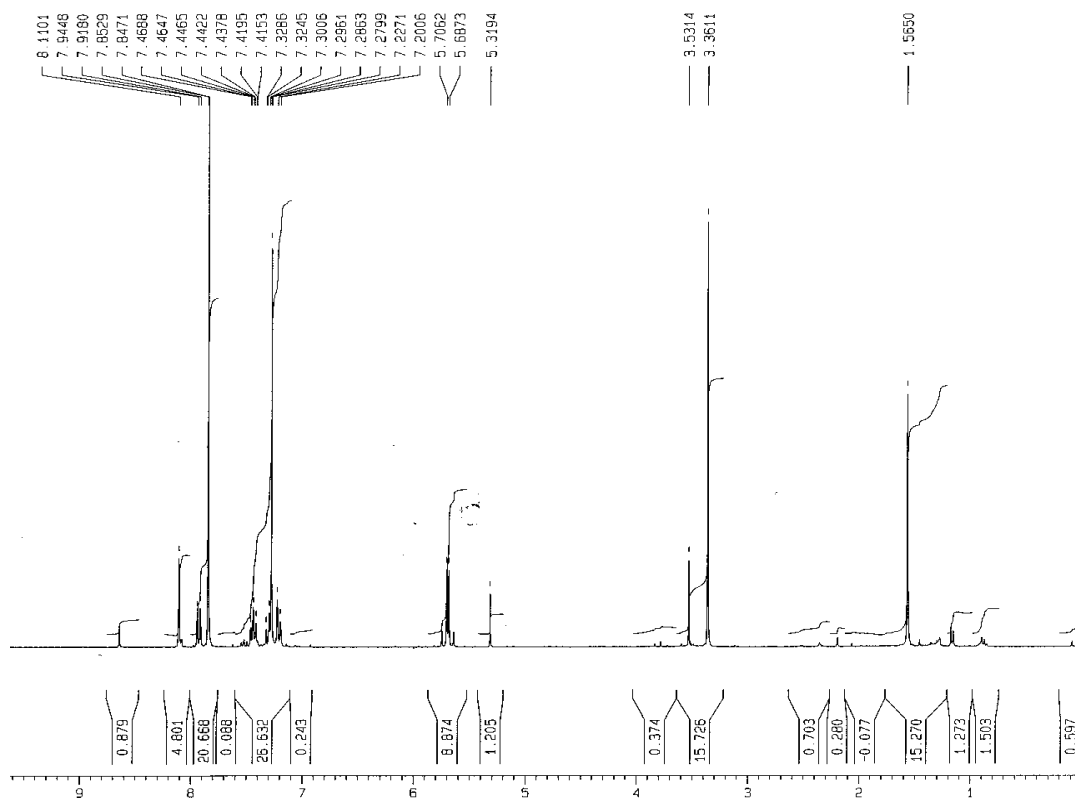

$^{13}\text{C}$  NMR ( $\text{CDCl}_3$ , 75 MHz)

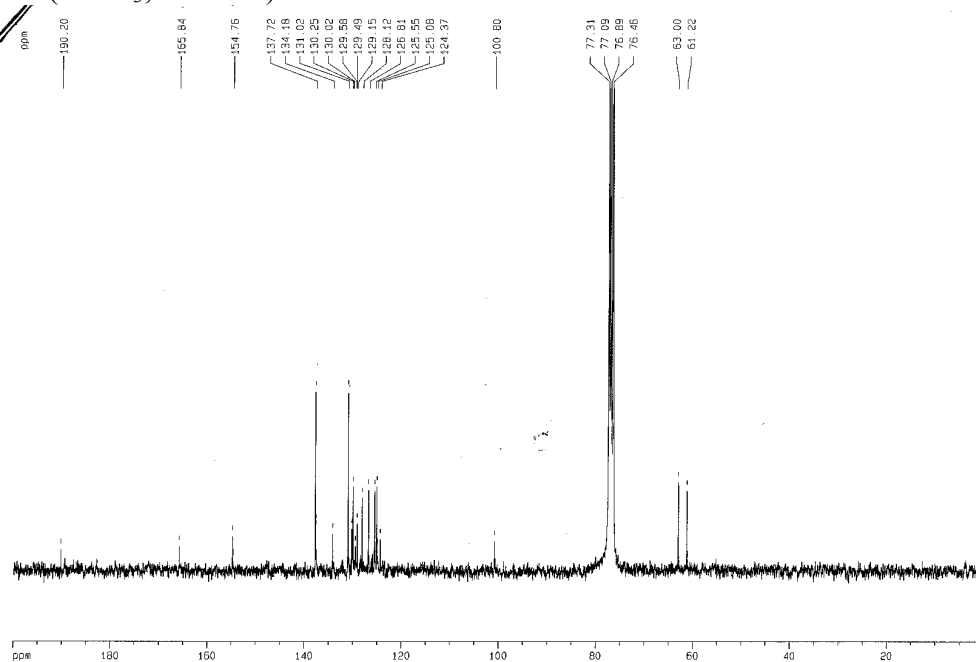

$^{13}\text{C}$  NMR DEPT ( $\text{CDCl}_3$ , 75 MHz)

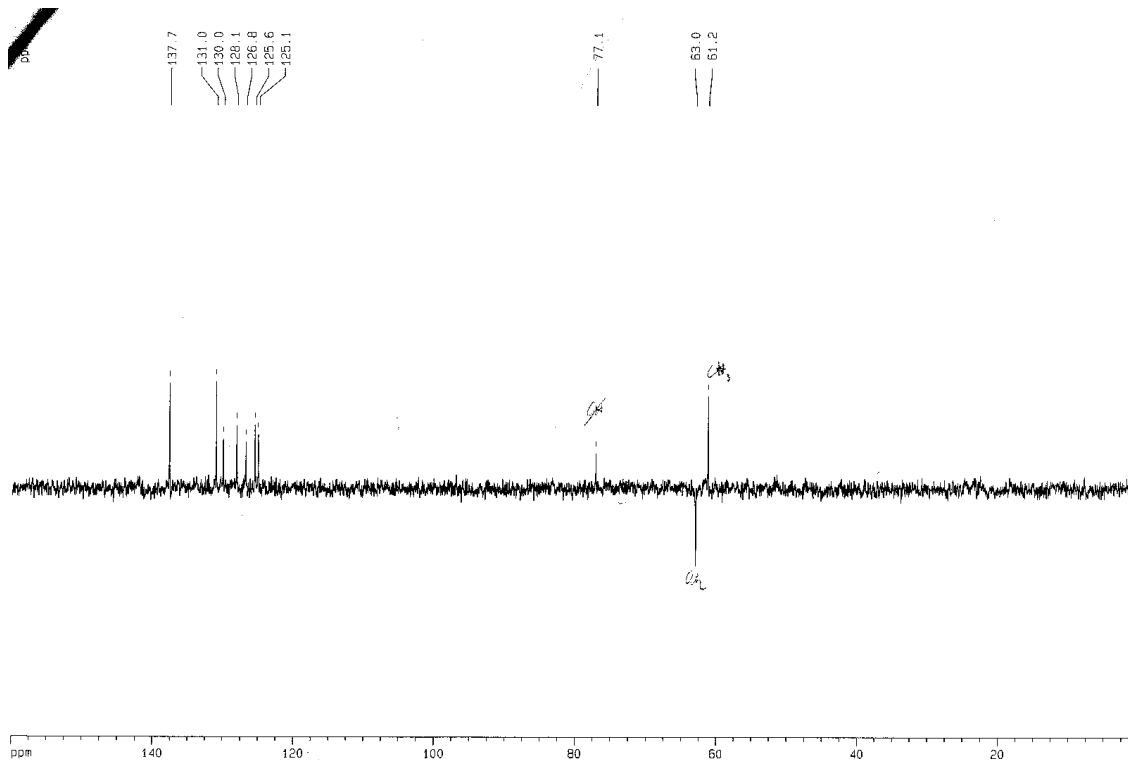

Compound (R)-6.

$^1\text{H}$  NMR ( $\text{CDCl}_3$ , 300 MHz)

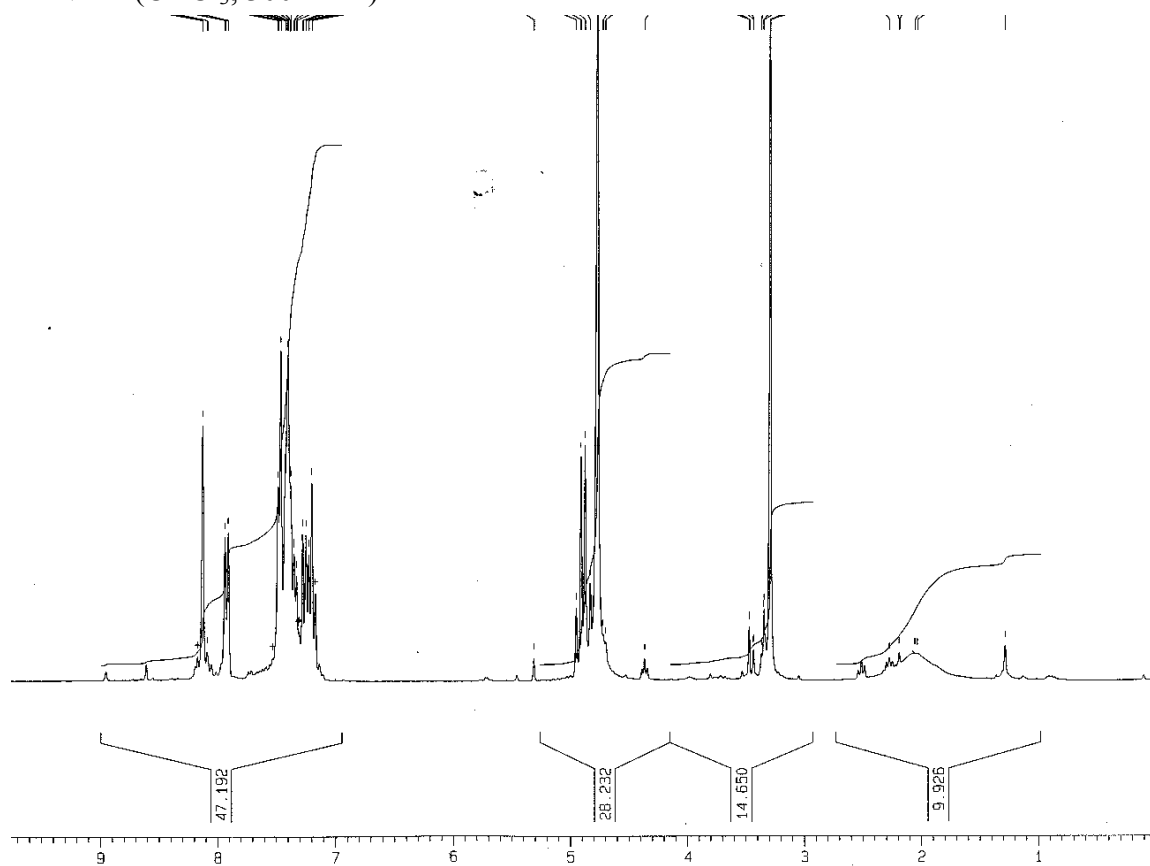

$^{13}\text{C}$  NMR ( $\text{CDCl}_3$ , 75 MHz)

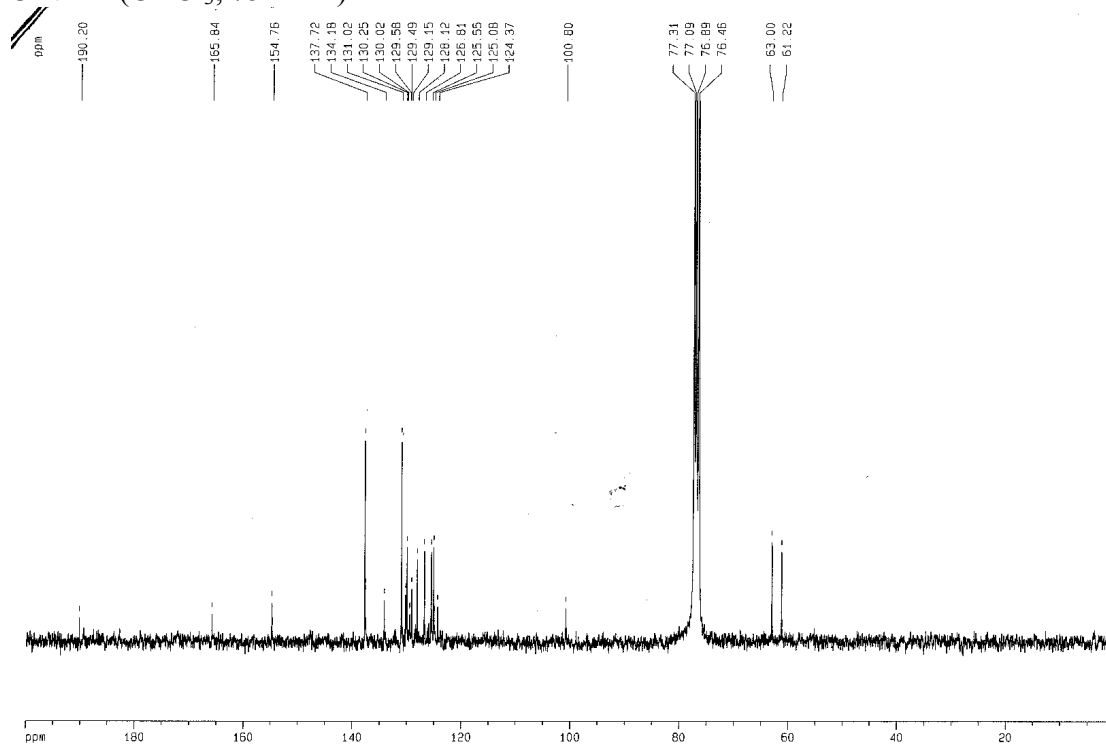



$^{13}\text{C}$  NMR DEPT ( $\text{CDCl}_3$ , 75 MHz)

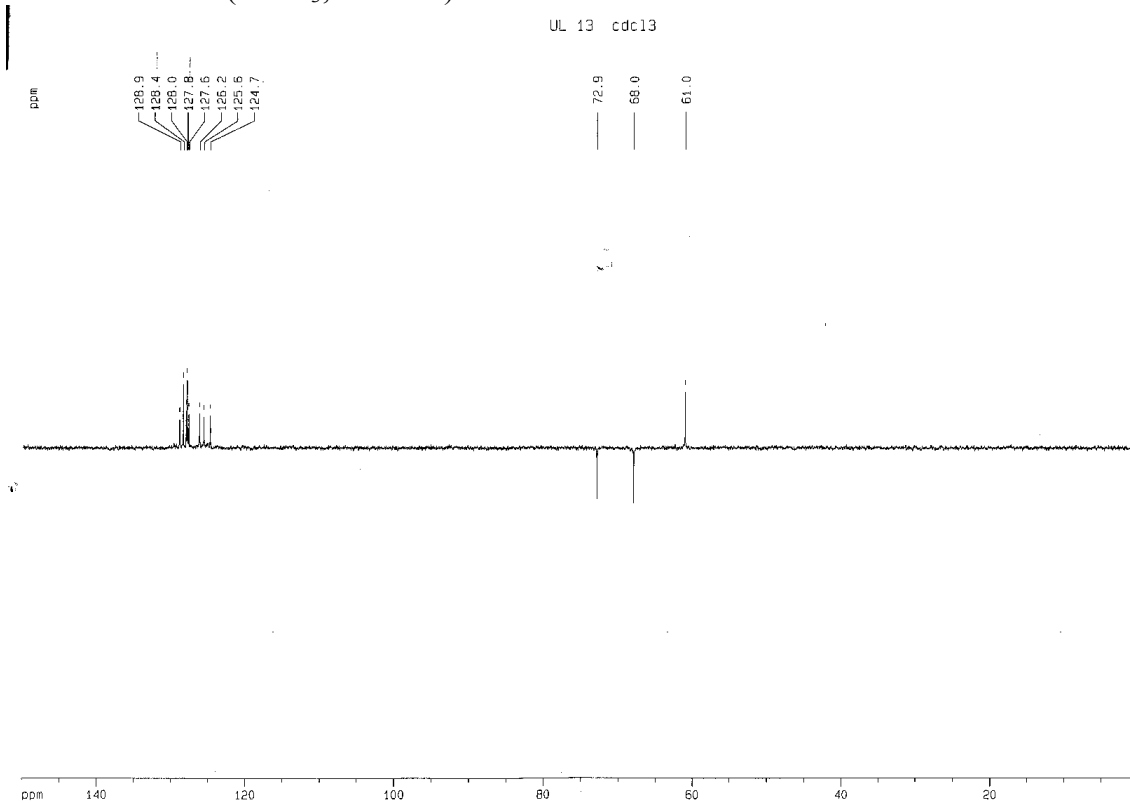

Compound (R)-7.

$^1\text{H}$  NMR ( $\text{CDCl}_3$ , 300 MHz)

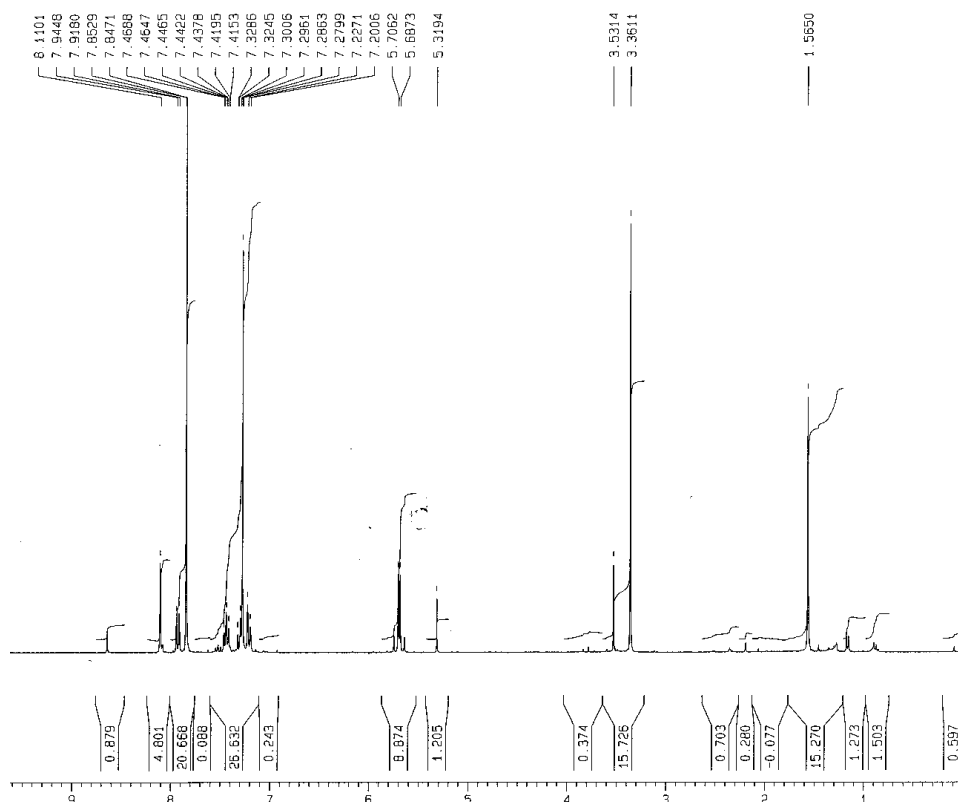

$^{13}\text{C}$  NMR ( $\text{CDCl}_3$ , 75 MHz)

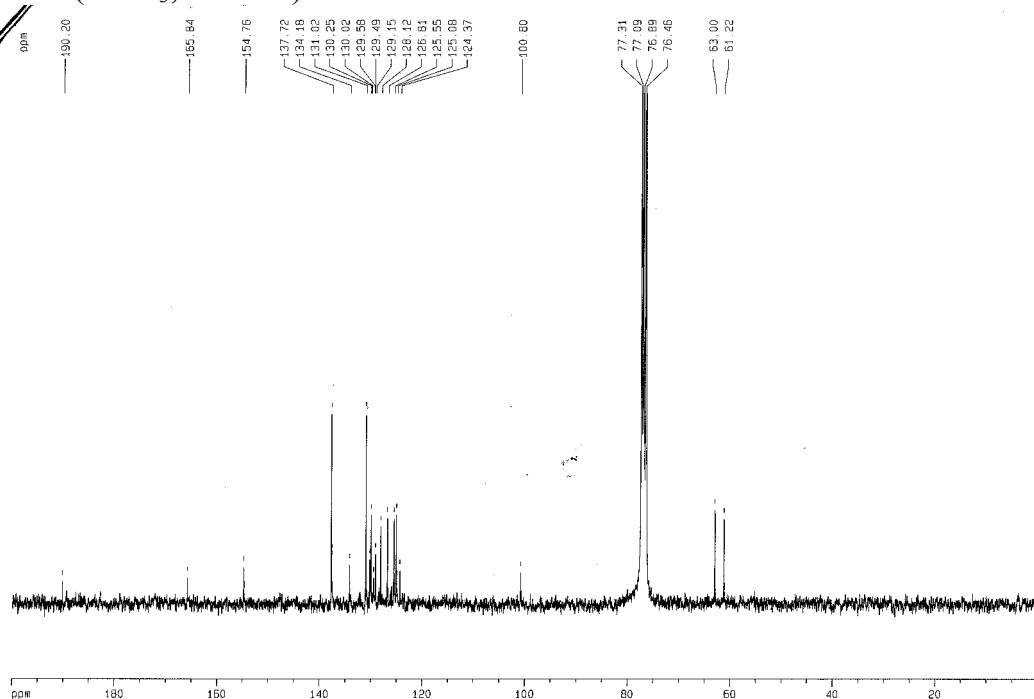

$^{13}\text{C}$  NMR DEPT ( $\text{CDCl}_3$ , 75 MHz)

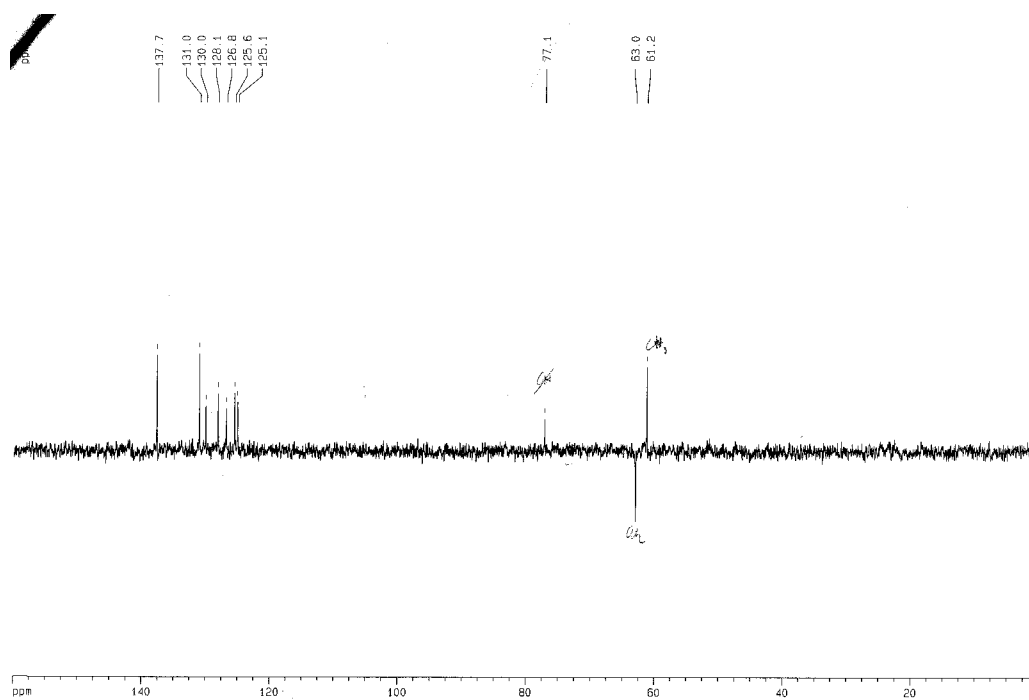

Macrocycle (RR)-8.

$^{13}\text{C}$  NMR ( $\text{CDCl}_3$ , 75 MHz)

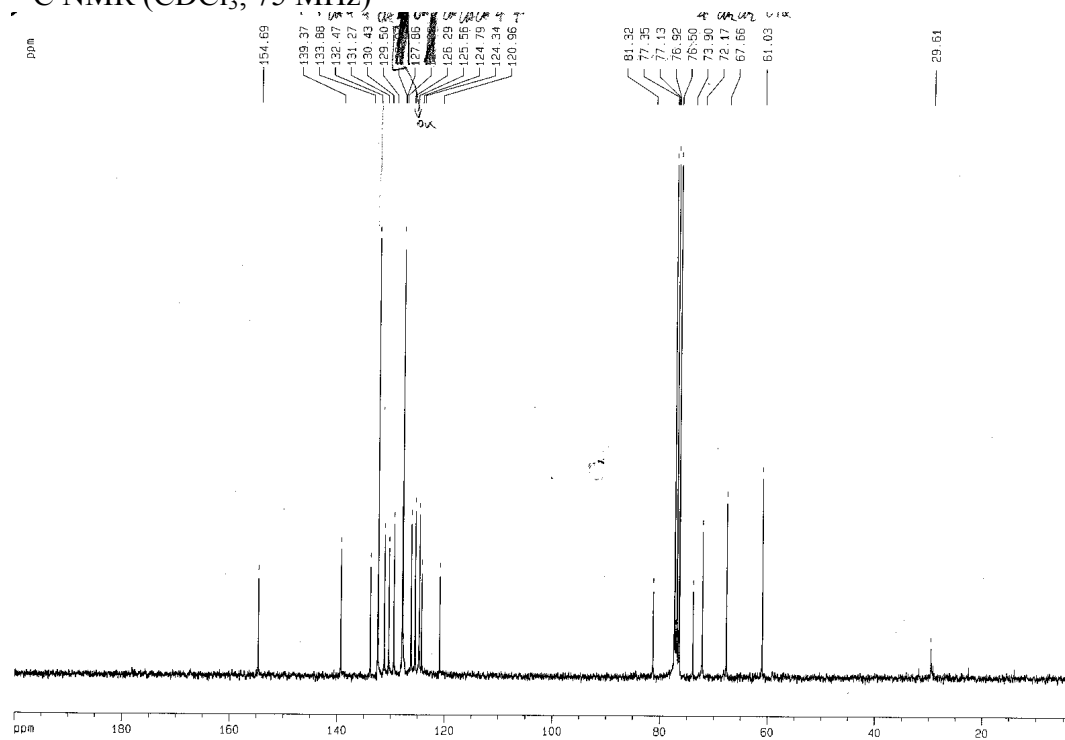

$^{13}\text{C}$  NMR DEPT ( $\text{CDCl}_3$ , 75 MHz)

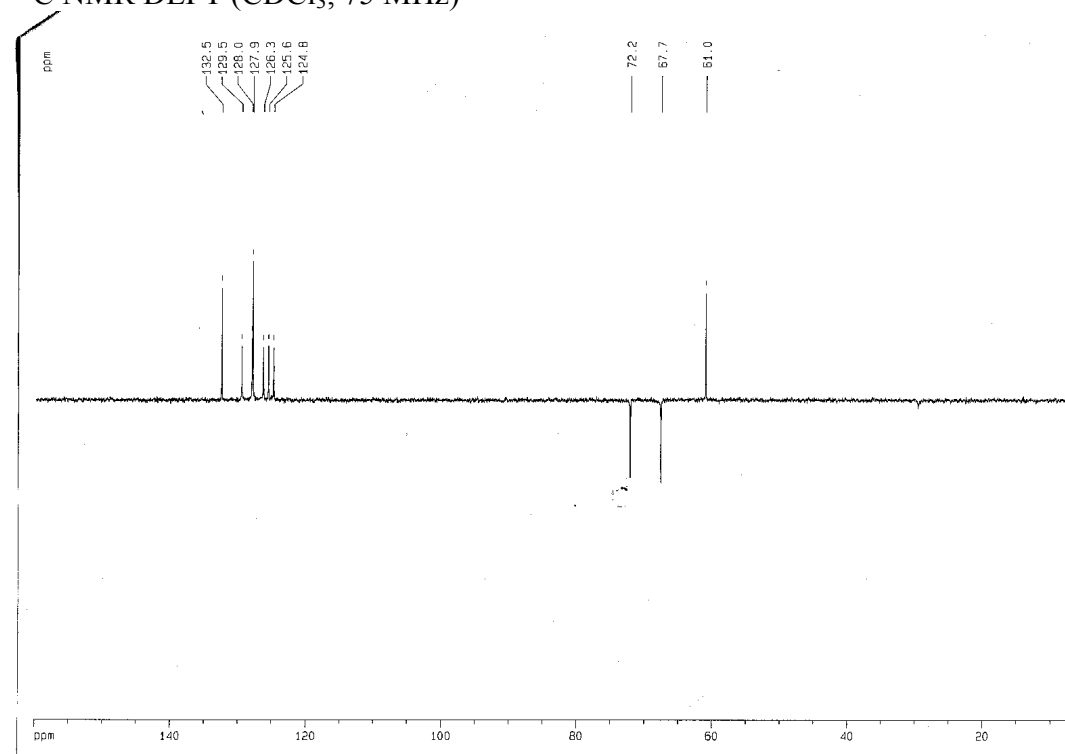

### ESI mass spectrum

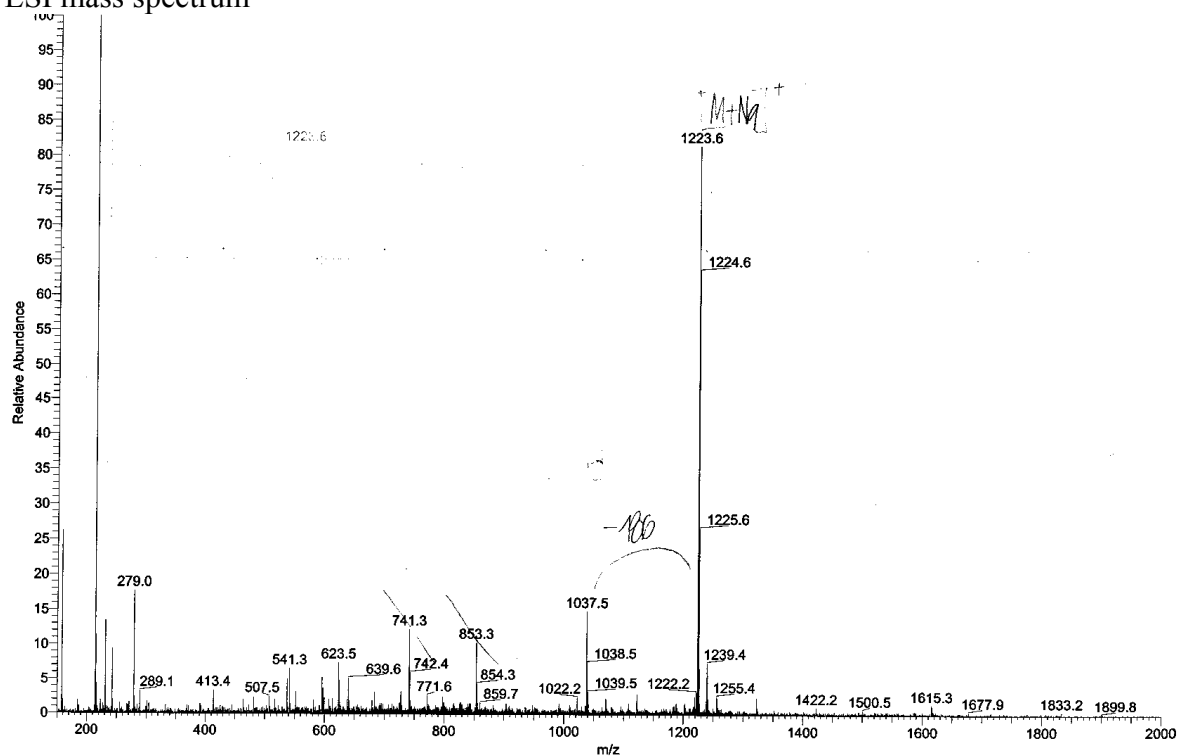

Macrocycle (RR)-9.

$^{13}\text{C}$  NMR ( $\text{CDCl}_3$ , 75 MHz)

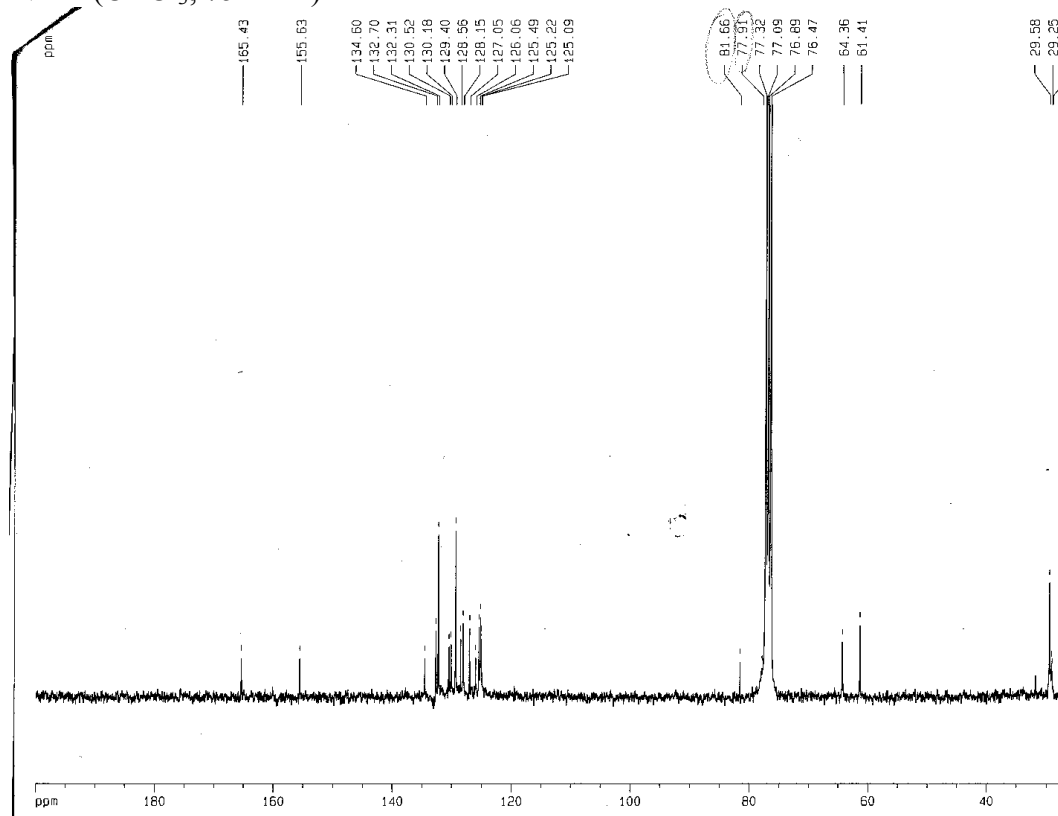

$^{13}\text{C}$  NMR DEPT ( $\text{CDCl}_3$ , 75 MHz)

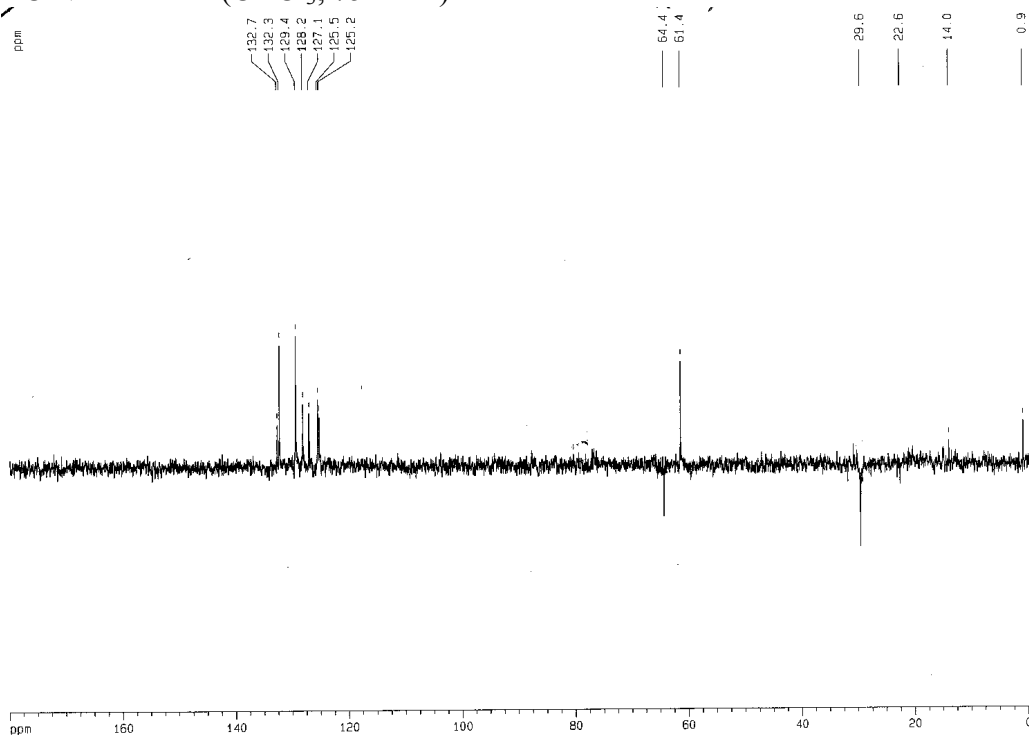

## ESI mass spectrum

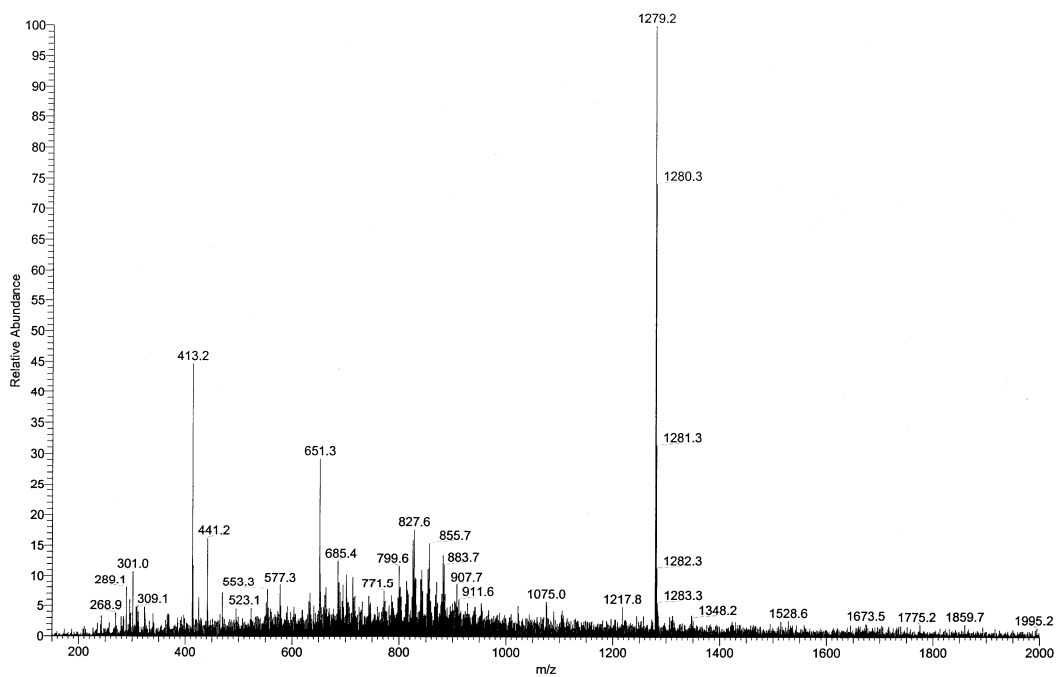

*Macrocycle (RR)-10.*

$^{13}\text{C}$  NMR ( $\text{CDCl}_3$ , 75 MHz)

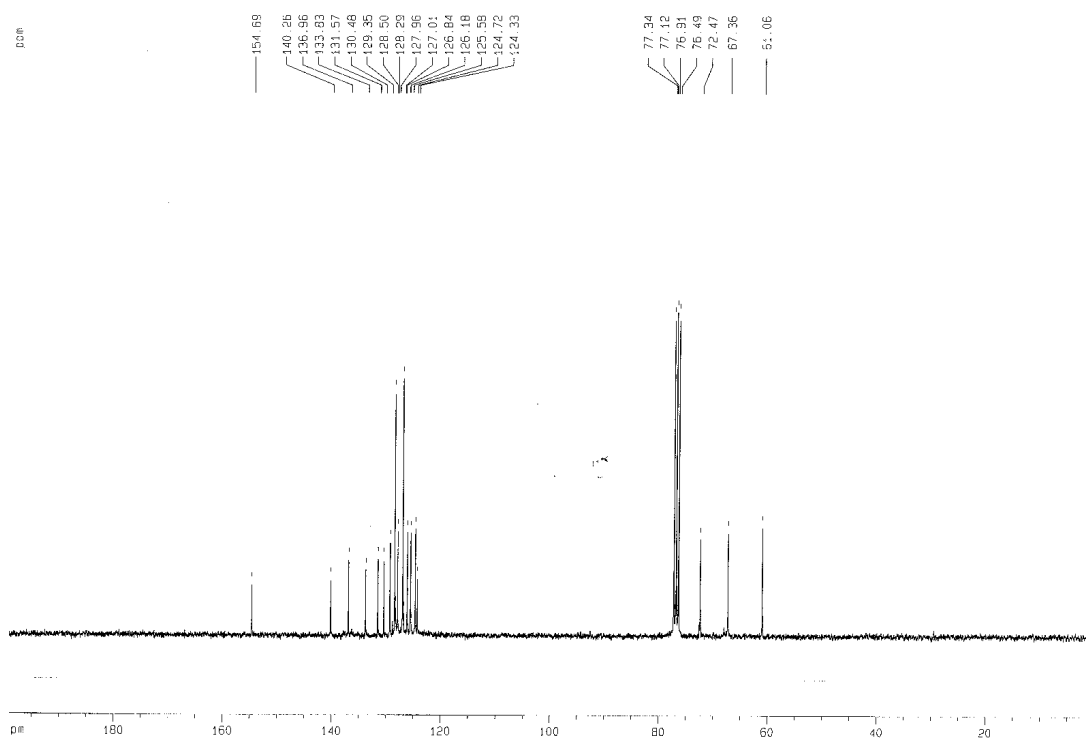

$^{13}\text{C}$  NMR DEPT ( $\text{CDCl}_3$ , 75 MHz)

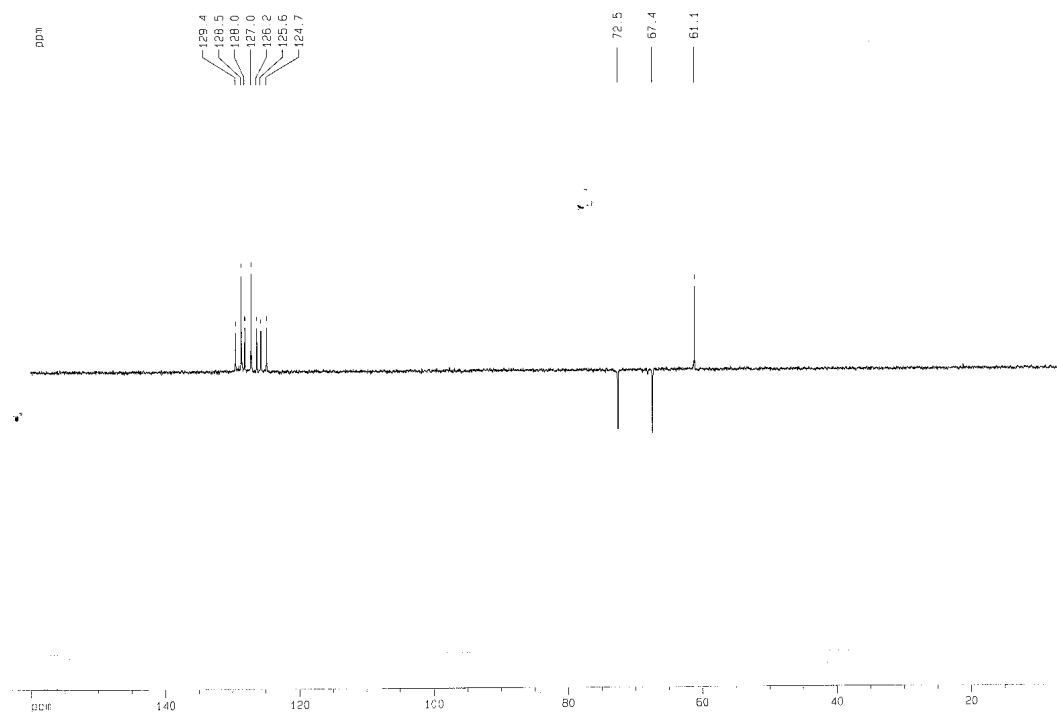



## ESI mass spectrum

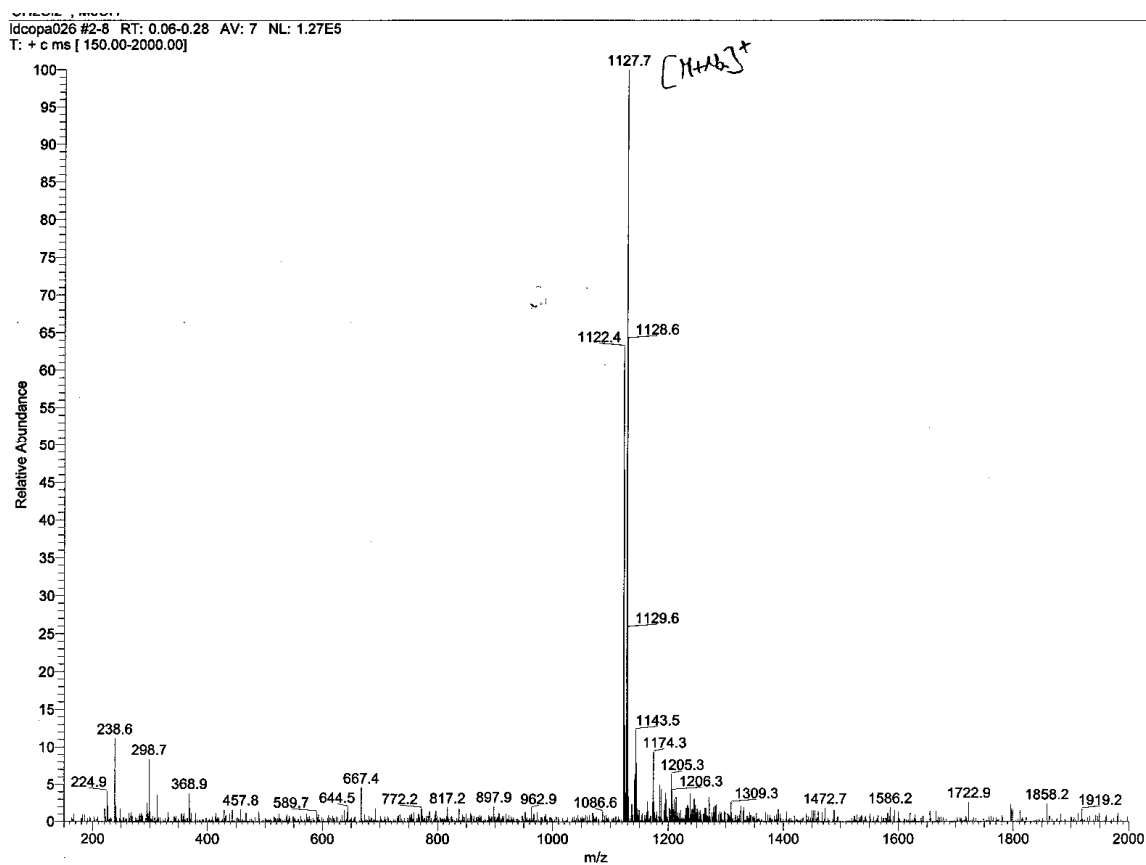

*Macrocycle (RR)-11.*

$^{13}\text{C}$  NMR ( $\text{CDCl}_3$ , 75 MHz)

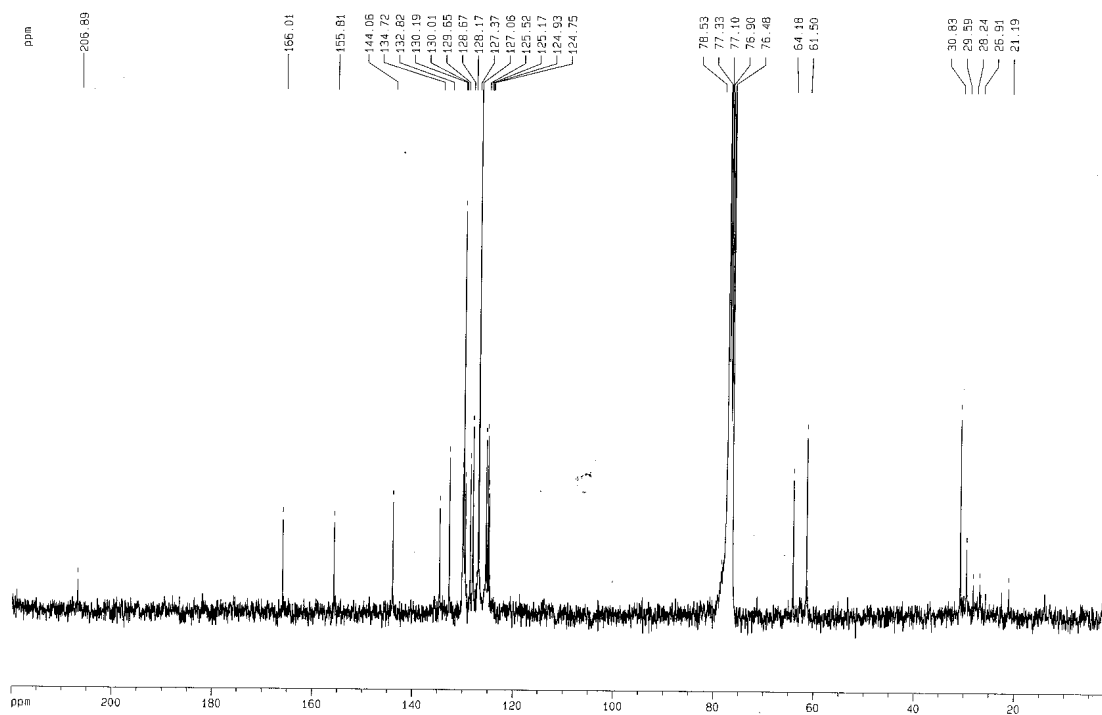

$^{13}\text{C}$  NMR DEPT ( $\text{CDCl}_3$ , 75 MHz)

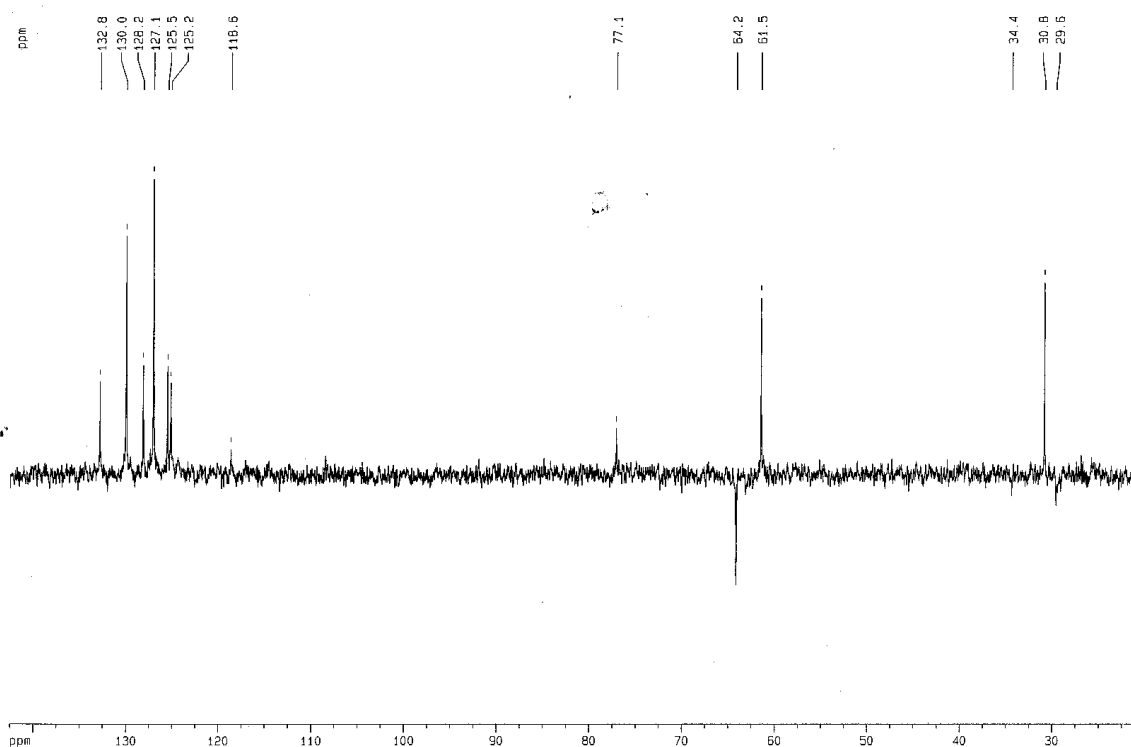

## ESI mass spectrum

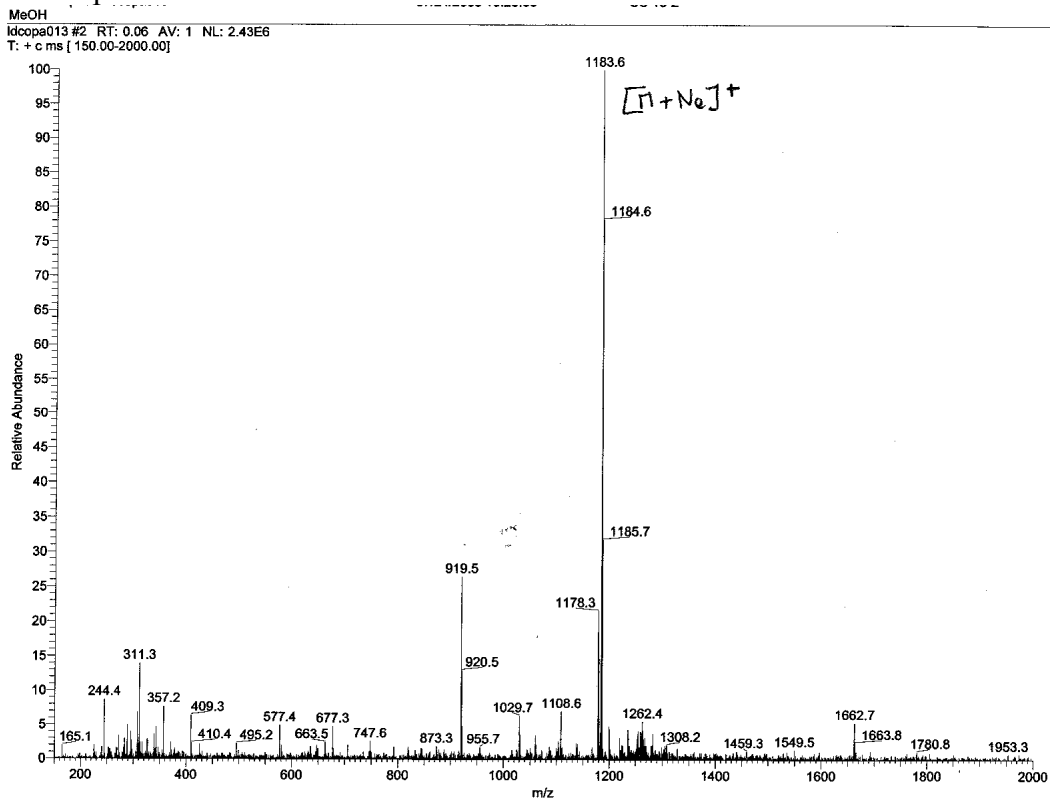

## Details on calculations.

Optimizations were carried out at the PM3 level of theory as implemented by the Gaussian 2003 package.<sup>S4</sup>

## Atomic Coordinates and Energies for the reported molecules

Below are listed coordinates in cartesian format (units are in Å) and energies (in parentheses, units are in Hartrees) for the most stable conformers of the reported molecules. The calculated energy for C<sub>60</sub>, used in this paper, was 1.29212107 Ha.

(RR) -8 (0.29613092 Ha)

|   |           |           |           |
|---|-----------|-----------|-----------|
| C | 10.095490 | 2.286756  | 4.187483  |
| C | 10.139838 | 1.431024  | 3.120872  |
| C | -9.789137 | 1.878419  | 1.816152  |
| C | -9.393643 | 3.220607  | 1.645605  |
| C | -9.354326 | 4.090807  | 2.769379  |
| C | -9.697758 | 3.632277  | 4.011466  |
| H | 10.368680 | 1.938931  | 5.189268  |
| H | 10.453137 | 0.387521  | 3.252338  |
| C | -9.824274 | 1.010753  | 0.681003  |
| C | -9.034134 | 3.688878  | 0.356567  |
| H | -9.043836 | 5.131419  | 2.621316  |
| H | -9.669168 | 4.298357  | 4.879998  |
| C | -9.069813 | 2.863208  | -0.738906 |
| C | -9.478628 | 1.503951  | -0.567307 |
| H | -8.700479 | 4.733240  | 0.243380  |
| C | 10.215940 | -0.401910 | 0.864888  |
| C | 11.600006 | -0.756742 | 0.827173  |
| C | -9.264331 | -1.389032 | 1.063875  |
| C | 12.623736 | 0.213088  | 0.636126  |
| C | 11.969465 | -2.107923 | 0.985565  |
| C | -9.638635 | -2.760764 | 1.209838  |
| C | 13.940316 | -0.158218 | 0.607953  |
| H | 12.335864 | 1.265513  | 0.519559  |
| C | 13.344210 | -2.469329 | 0.951742  |
| C | 10.968815 | -3.095875 | 1.173849  |
| C | 14.306335 | -1.514725 | 0.766654  |
| H | 14.725045 | 0.591753  | 0.463538  |
| H | 13.615794 | -3.524037 | 1.075735  |
| H | 11.274170 | -4.144773 | 1.283981  |
| H | 15.366181 | -1.788207 | 0.739995  |
| O | -7.908876 | -1.063669 | 1.017153  |
| O | -9.420404 | 0.644955  | -1.663981 |
| C | -8.683738 | 3.406119  | -2.091674 |
| H | -9.288034 | 4.307345  | -2.317971 |
| C | -8.613282 | -3.846371 | 1.414451  |
| H | -7.576365 | -3.457765 | 1.391973  |
| H | -8.776097 | -4.349381 | 2.384164  |
| H | -8.666021 | -3.717979 | -1.199978 |
| C | -8.266336 | -4.671649 | -0.803840 |
| H | -8.719872 | -5.504072 | -1.370079 |
| O | -8.754513 | -4.919619 | 0.502980  |
| C | -6.765193 | -4.706626 | -0.886531 |
| C | -6.035923 | -3.517168 | -0.912317 |
| C | -6.097712 | -5.930402 | -0.948204 |
| C | -4.649767 | -3.547478 | -1.001719 |
| H | -6.558872 | -2.552952 | -0.859531 |
| C | -4.712083 | -5.970327 | -1.036146 |
| H | -6.671092 | -6.864274 | -0.924614 |

|   |           |           |           |
|---|-----------|-----------|-----------|
| C | -3.983388 | -4.776121 | -1.063710 |
| H | -4.190586 | -6.932120 | -1.084156 |
| H | -8.846084 | 2.673898  | -2.902933 |
| H | -4.080303 | -2.612040 | -1.024817 |
| C | -2.572057 | -4.809603 | -1.153896 |
| C | -1.377656 | -4.833500 | -1.229816 |
| O | -7.299586 | 3.652956  | -2.226327 |
| C | -0.015013 | -4.855310 | -1.316437 |
| C | 1.179522  | -4.869840 | -1.392463 |
| C | 2.591074  | -4.881403 | -1.483014 |
| C | 3.230043  | -5.779475 | -2.344572 |
| C | 3.347825  | -3.990868 | -0.713220 |
| C | 4.616371  | -5.782643 | -2.434094 |
| H | 2.637864  | -6.474097 | -2.949755 |
| C | 4.733569  | -4.004542 | -0.804489 |
| H | 2.847586  | -3.283996 | -0.042679 |
| C | 5.373503  | -4.899235 | -1.663867 |
| H | 5.114398  | -6.480821 | -3.116856 |
| H | 5.329676  | -3.303820 | -0.208395 |
| C | 6.871043  | -4.924551 | -1.749246 |
| H | 7.230401  | -5.706258 | -2.447603 |
| H | 7.308656  | -5.147382 | -0.749816 |
| C | -7.366268 | -0.736329 | 2.279140  |
| H | -7.888857 | 0.109980  | 2.743875  |
| H | -7.377505 | -1.594614 | 2.961214  |
| H | -6.337556 | -0.461723 | 2.033841  |
| C | 10.644133 | 0.536020  | -2.359805 |
| H | 11.457432 | 0.183363  | -1.711850 |
| H | 10.933228 | 1.485119  | -2.826426 |
| H | 10.418198 | -0.207911 | -3.127485 |
| C | 10.215882 | 0.401888  | 0.864889  |
| C | 9.824292  | -1.010791 | 0.680960  |
| C | 11.599924 | 0.756806  | 0.827123  |
| C | 9.264223  | 1.388944  | 1.063953  |
| C | 9.789216  | -1.878496 | 1.816083  |
| C | 9.478610  | -1.503956 | -0.567352 |
| C | 12.623706 | -0.212953 | 0.635991  |
| C | 11.969309 | 2.108000  | 0.985577  |
| C | 9.638450  | 2.760691  | 1.209969  |
| O | 7.908787  | 1.063496  | 1.017263  |
| C | 10.139915 | -1.431126 | 3.120812  |
| C | 9.393780  | -3.220696 | 1.645499  |
| C | 9.069830  | -2.863219 | -0.738982 |
| O | 9.420322  | -0.644920 | -1.663991 |
| C | 13.940262 | 0.158434  | 0.607791  |
| H | 12.335895 | -1.265394 | 0.519412  |
| C | 13.344028 | 2.469493  | 0.951702  |
| C | 10.968608 | 3.095883  | 1.173945  |
| C | 8.613025  | 3.846208  | 1.414692  |
| C | 7.366228  | 0.736146  | 2.279269  |
| C | 10.095619 | -2.286894 | 4.187397  |
| H | 10.453142 | -0.387606 | 3.252314  |
| C | 9.354528  | -4.090936 | 2.769244  |
| C | 9.034227  | -3.688930 | 0.356460  |
| C | 8.683706  | -3.406093 | -2.091748 |
| C | 10.644023 | -0.535922 | -2.359853 |
| C | 14.306205 | 1.514955  | 0.766541  |
| H | 14.725032 | -0.591483 | 0.463310  |
| H | 13.615554 | 3.524208  | 1.075763  |
| H | 11.273909 | 4.144791  | 1.284133  |
| H | 7.576128  | 3.457563  | 1.391961  |
| H | 8.775675  | 4.348983  | 2.384554  |
| O | 8.754326  | 4.919687  | 0.503507  |

|   |           |           |           |
|---|-----------|-----------|-----------|
| H | 7.888875  | -0.110127 | 2.744002  |
| H | 7.377435  | 1.594442  | 2.961329  |
| H | 6.337524  | 0.461479  | 2.034000  |
| C | 9.697966  | -3.632432 | 4.011340  |
| H | 10.368830 | -1.939094 | 5.189185  |
| H | 9.044095  | -5.131561 | 2.621152  |
| H | 8.700615  | -4.733303 | 0.243245  |
| H | 9.288041  | -4.307275 | -2.318118 |
| H | 8.845968  | -2.673824 | -2.902981 |
| O | 7.299556  | -3.652996 | -2.226325 |
| H | 11.457353 | -0.183330 | -1.711903 |
| H | 10.933090 | -1.484980 | -2.826575 |
| H | 10.418060 | 0.208081  | -3.127456 |
| H | 15.366032 | 1.788506  | 0.739838  |
| C | 8.266378  | 4.671989  | -0.803450 |
| H | 9.669421  | -4.298543 | 4.879849  |
| H | 8.666199  | 3.718441  | -1.199746 |
| H | 8.719946  | 5.504578  | -1.369418 |
| C | 6.765248  | 4.706876  | -0.886372 |
| C | 6.036062  | 3.517374  | -0.912486 |
| C | 6.097695  | 5.930619  | -0.947929 |
| C | 4.649918  | 3.547607  | -1.002109 |
| H | 6.559067  | 2.553183  | -0.859794 |
| C | 4.712077  | 5.970467  | -1.036078 |
| H | 6.671008  | 6.864526  | -0.924065 |
| C | 3.983468  | 4.776217  | -1.063975 |
| H | 4.080520  | 2.612135  | -1.025464 |
| H | 4.190524  | 6.932233  | -1.084008 |
| C | 2.572149  | 4.809628  | -1.154356 |
| C | 1.377739  | 4.833491  | -1.230148 |
| C | 0.015092  | 4.855246  | -1.316709 |
| C | -1.179444 | 4.869734  | -1.392718 |
| C | -2.591002 | 4.881277  | -1.483189 |
| C | -3.230081 | 5.780179  | -2.343809 |
| C | -3.347651 | 3.989913  | -0.714259 |
| C | -4.616410 | 5.783348  | -2.433247 |
| H | -2.637977 | 6.475466  | -2.948300 |
| C | -4.733406 | 4.003588  | -0.805439 |
| H | -2.847337 | 3.282391  | -0.044462 |
| C | -5.373445 | 4.899109  | -1.663871 |
| H | -5.114522 | 6.482177  | -3.115283 |
| H | -5.329429 | 3.302221  | -0.210021 |
| C | -6.870987 | 4.924445  | -1.749148 |
| H | -7.230393 | 5.706241  | -2.447383 |
| H | -7.308501 | 5.147177  | -0.749652 |

(RR) -9 (0.05863044)

|   |           |          |           |
|---|-----------|----------|-----------|
| C | -8.357097 | 4.381667 | 3.160884  |
| C | -8.726161 | 3.353164 | 2.336668  |
| C | -7.816036 | 2.831463 | 1.376377  |
| C | -6.524850 | 3.390249 | 1.291927  |
| C | -6.165074 | 4.457833 | 2.158642  |
| C | -7.062329 | 4.941316 | 3.071735  |
| H | -9.062066 | 4.783316 | 3.896306  |
| H | -9.732678 | 2.920234 | 2.397353  |
| C | -8.171196 | 1.758474 | 0.500231  |
| C | -5.590732 | 2.881923 | 0.350197  |
| H | -5.159213 | 4.886231 | 2.080652  |
| H | -6.789411 | 5.764765 | 3.739804  |
| C | -5.929716 | 1.862924 | -0.500172 |
| C | -7.246966 | 1.303967 | -0.423655 |
| H | -4.586266 | 3.325918 | 0.325137  |

|   |           |           |           |
|---|-----------|-----------|-----------|
| C | -9.507844 | 1.138860  | 0.609520  |
| C | 10.606190 | 1.696585  | -0.115857 |
| C | -9.709706 | 0.013108  | 1.390216  |
| C | 10.466662 | 2.864660  | -0.916110 |
| C | 11.870063 | 1.077446  | -0.035049 |
| C | 10.983693 | -0.635259 | 1.442811  |
| C | 11.539992 | 3.379161  | -1.591366 |
| H | -9.483306 | 3.348620  | -0.973873 |
| C | 12.969921 | 1.630399  | -0.746335 |
| C | 12.035663 | -0.095295 | 0.747254  |
| C | 12.806247 | 2.755940  | -1.506741 |
| H | 11.429290 | 4.280385  | -2.203726 |
| H | 13.946894 | 1.138269  | -0.674002 |
| H | 13.025477 | -0.570475 | 0.780172  |
| H | 13.650488 | 3.185654  | -2.055953 |
| O | -8.630352 | -0.566469 | 2.057932  |
| O | -7.530315 | 0.197103  | -1.223535 |
| C | -4.971410 | 1.276012  | -1.498313 |
| H | -5.365707 | 1.402324  | -2.526812 |
| C | 11.178210 | -1.883586 | 2.260370  |
| H | 10.215717 | -2.360070 | 2.532475  |
| H | 11.727144 | -1.648808 | 3.190511  |
| C | 11.532473 | -3.725809 | 0.744576  |
| O | 12.039434 | -2.826807 | 1.643885  |
| C | 10.085716 | -3.831814 | 0.415761  |
| C | -9.598657 | -3.233393 | -0.745549 |
| C | -9.231098 | -4.544165 | 1.257685  |
| C | -8.244811 | -3.313208 | -1.048705 |
| H | 10.277248 | -2.687772 | -1.411228 |
| C | -7.878055 | -4.631794 | 0.955098  |
| H | -9.624224 | -5.030747 | 2.157401  |
| C | -7.379458 | -4.001415 | -0.190961 |
| H | -7.201321 | -5.182948 | 1.616954  |
| H | -4.830805 | 0.195557  | -1.304884 |
| H | -7.854931 | -2.815891 | -1.944831 |
| C | -5.991949 | -4.026104 | -0.466318 |
| C | -4.815491 | -4.001251 | -0.686012 |
| O | -3.635957 | 1.735770  | -1.378564 |
| C | -3.473322 | -3.925291 | -0.926516 |
| C | -2.298680 | -3.816339 | -1.129624 |
| C | -0.915673 | -3.635136 | -1.364417 |
| C | -0.433543 | -3.555659 | -2.675846 |
| C | -0.037197 | -3.502027 | -0.282684 |
| C | 0.915525  | -3.313008 | -2.902647 |
| H | -1.119721 | -3.677373 | -3.521123 |
| C | 1.310021  | -3.255052 | -0.513609 |
| H | -0.413958 | -3.580679 | 0.742940  |
| C | 1.782564  | -3.144222 | -1.822222 |
| H | 1.297397  | -3.250403 | -3.928412 |
| H | 2.000297  | -3.136563 | 0.330607  |
| C | 3.215696  | -2.835495 | -2.080503 |
| C | -8.495988 | -0.115929 | 3.389661  |
| H | -8.377381 | 0.974028  | 3.445637  |
| H | -9.346942 | -0.426511 | 4.007670  |
| H | -7.583604 | -0.616216 | 3.722696  |
| C | -8.194220 | 0.516884  | -2.427945 |
| H | -9.131094 | 1.062029  | -2.253563 |
| H | -7.552923 | 1.094496  | -3.104093 |
| H | -8.399801 | -0.470721 | -2.850810 |
| C | 9.507825  | -1.138740 | 0.609592  |
| C | 8.171297  | -1.758589 | 0.500164  |
| C | 10.606350 | -1.696368 | -0.115591 |
| C | 9.709430  | -0.012919 | 1.390258  |

|   |           |           |           |
|---|-----------|-----------|-----------|
| C | 7.816209  | -2.831584 | 1.376333  |
| C | 7.247153  | -1.304379 | -0.423952 |
| C | 10.467095 | -2.864515 | -0.915784 |
| C | 11.870127 | -1.077051 | -0.034649 |
| C | 10.983322 | 0.635631  | 1.442978  |
| O | 8.629896  | 0.566527  | 2.057798  |
| C | 8.726239  | -3.352949 | 2.336899  |
| C | 6.525166  | -3.390668 | 1.291678  |
| C | 5.930066  | -1.863685 | -0.500729 |
| O | 7.530412  | -0.197471 | -1.223801 |
| C | 11.540588 | -3.378912 | -1.590861 |
| H | 9.483811  | -3.348608 | -0.973665 |
| C | 12.970159 | -1.629897 | -0.745748 |
| C | 12.035458 | 0.095766  | 0.747600  |
| C | 11.177539 | 1.884031  | 2.260498  |
| C | 8.495554  | 0.116210  | 3.389606  |
| C | 8.357233  | -4.381441 | 3.161155  |
| H | 9.732641  | -2.919775 | 2.397758  |
| C | 6.165446  | -4.458231 | 2.158444  |
| C | 5.591150  | -2.882697 | 0.349656  |
| C | 4.971876  | -1.277207 | -1.499247 |
| C | 8.194477  | -0.517151 | -2.428146 |
| C | 12.806752 | -2.755530 | -1.506076 |
| H | 11.430104 | -4.280215 | -2.203144 |
| H | 13.947067 | -1.137658 | -0.673271 |
| H | 13.025209 | 0.571071  | 0.780630  |
| H | 10.214941 | 2.360505  | 2.532243  |
| H | 11.726171 | 1.649341  | 3.190840  |
| O | 12.038934 | 2.827224  | 1.644213  |
| H | 8.377112  | -0.973755 | 3.445766  |
| H | 9.346436  | 0.427029  | 4.007597  |
| H | 7.583080  | 0.616415  | 3.722515  |
| C | 7.062615  | -4.941401 | 3.071787  |
| H | 9.062130  | -4.782833 | 3.896786  |
| H | 5.159705  | -4.886879 | 2.080276  |
| H | 4.586808  | -3.326960 | 0.324405  |
| H | 5.366194  | -1.404296 | -2.527644 |
| H | 4.831492  | -0.196595 | -1.306552 |
| O | 3.636338  | -1.736646 | -1.379133 |
| H | 9.131362  | -1.062251 | -2.253691 |
| H | 7.553281  | -1.094762 | -3.104392 |
| H | 8.400046  | 0.470487  | -2.850941 |
| H | 13.651117 | -3.185134 | -2.055184 |
| C | 11.532186 | 3.726204  | 0.744763  |
| H | 6.789738  | -5.764827 | 3.739902  |
| C | 10.085491 | 3.832226  | 0.415681  |
| C | 9.598520  | 3.233391  | -0.745449 |
| C | 9.230840  | 4.545000  | 1.257215  |
| C | 8.244716  | 3.313219  | -1.048805 |
| H | 10.277133 | 2.687420  | -1.410819 |
| C | 7.877847  | 4.632641  | 0.954427  |
| H | 9.623908  | 5.031899  | 2.156785  |
| C | 7.379329  | 4.001858  | -0.191446 |
| H | 7.854904  | 2.815589  | -1.944788 |
| H | 7.201085  | 5.184134  | 1.615973  |
| C | 5.991851  | 4.026556  | -0.466954 |
| C | 4.815408  | 4.001774  | -0.686739 |
| C | 3.473245  | 3.925773  | -0.927268 |
| C | 2.298605  | 3.816627  | -1.130280 |
| C | 0.915593  | 3.635206  | -1.364875 |
| C | 0.433260  | 3.555616  | -2.676219 |
| C | 0.037318  | 3.501964  | -0.282991 |
| C | -0.915795 | 3.312666  | -2.902790 |



|   |           |           |           |
|---|-----------|-----------|-----------|
| H | 1.119271  | 3.677451  | -3.521613 |
| C | -1.309882 | 3.254696  | -0.513686 |
| H | 0.414235  | 3.580715  | 0.742569  |
| C | -1.782619 | 3.143719  | -1.822219 |
| H | -1.297830 | 3.249981  | -3.928490 |
| H | -2.000001 | 3.136124  | 0.330648  |
| C | -3.215707 | 2.834576  | -2.080241 |
| O | -3.976814 | 3.413450  | -2.828234 |
| O | 12.442354 | 4.395510  | 0.307500  |
| O | 12.442539 | -4.395142 | 0.307143  |
| O | 3.976534  | -3.414748 | -2.828476 |

(RR) -10 (-0.03838677)

|   |           |           |           |
|---|-----------|-----------|-----------|
| C | -9.322731 | 1.728164  | 0.620554  |
| C | -8.216339 | 0.929746  | 0.517638  |
| C | -7.208517 | 1.207144  | -0.447467 |
| C | -7.376103 | 2.317052  | -1.299838 |
| C | -8.532514 | 3.134281  | -1.171483 |
| C | -9.483364 | 2.844593  | -0.231755 |
| C | -6.043093 | 0.390473  | -0.585763 |
| C | -6.397822 | 2.607175  | -2.285609 |
| C | -5.283355 | 1.820086  | -2.433567 |
| C | -5.117041 | 0.688104  | -1.574137 |
| C | -5.865696 | -0.769818 | 0.312742  |
| C | -6.169219 | -2.079444 | -0.175684 |
| C | -5.429023 | -0.617047 | 1.619634  |
| C | -6.661754 | -2.300248 | -1.492206 |
| C | -5.986020 | -3.191303 | 0.671174  |
| C | -5.267650 | -1.743879 | 2.485794  |
| C | -6.939521 | -3.566035 | -1.931109 |
| C | -6.275272 | -4.497870 | 0.190645  |
| C | -5.534715 | -2.999589 | 2.002104  |
| C | -6.741122 | -4.679224 | -1.082528 |
| O | -5.271876 | 0.659403  | 2.163016  |
| O | -4.085429 | -0.220920 | -1.810358 |
| C | -4.287301 | 2.131199  | -3.518119 |
| C | -4.897108 | -1.567148 | 3.933940  |
| O | -4.096616 | 3.541248  | -3.609043 |
| C | -2.754907 | 3.955020  | -3.759432 |
| C | -1.897764 | 3.707923  | -2.548994 |
| C | -2.200312 | 4.330119  | -1.337427 |
| C | -0.790735 | 2.862758  | -2.632302 |
| C | -1.413370 | 4.098442  | -0.216376 |
| C | -0.001671 | 2.628803  | -1.512445 |
| C | -0.313620 | 3.240357  | -0.296044 |
| C | 0.513346  | 2.985234  | 0.890100  |
| C | 0.820582  | 1.677342  | 1.270034  |
| C | 1.006094  | 4.054127  | 1.643047  |
| C | 1.618774  | 1.442237  | 2.383078  |
| C | 1.801006  | 3.815468  | 2.756045  |
| C | 2.112513  | 2.507848  | 3.134479  |
| C | 2.930422  | 2.286395  | 4.375963  |
| O | 3.657833  | 1.072821  | 4.373024  |
| C | -2.652563 | -2.238188 | 4.471638  |
| C | -1.916062 | -2.466035 | 3.181290  |
| O | -4.026065 | -2.570240 | 4.426849  |
| C | -1.612977 | -3.762861 | 2.766050  |
| C | -1.493111 | -1.382472 | 2.412587  |
| C | -0.885723 | -3.973378 | 1.601003  |
| C | -0.756549 | -1.587984 | 1.252679  |
| C | -0.450283 | -2.886455 | 0.838958  |
| C | 0.322159  | -3.107286 | -0.390535 |
| C | 1.447851  | -3.934689 | -0.378684 |

|   |           |           |           |
|---|-----------|-----------|-----------|
| C | -0.064040 | -2.485814 | -1.580146 |
| C | 2.189153  | -4.121070 | -1.539089 |
| C | 0.679665  | -2.672580 | -2.738636 |
| C | 1.815459  | -3.482662 | -2.722053 |
| C | 2.622858  | -3.670991 | -3.976106 |
| O | 3.968378  | -3.257577 | -3.868947 |
| C | 4.161817  | -1.858634 | -3.672802 |
| C | 5.188036  | -1.635038 | -2.594450 |
| C | 6.298109  | -2.440228 | -2.539905 |
| C | 5.053774  | -0.574599 | -1.642576 |
| C | 7.301688  | -2.242970 | -1.557014 |
| C | 6.002791  | -0.373816 | -0.651720 |
| O | 4.034707  | 0.367217  | -1.786436 |
| C | 7.162287  | -1.210257 | -0.608482 |
| C | 8.452572  | -3.077289 | -1.526211 |
| C | 5.863837  | 0.699446  | 0.355074  |
| C | 8.192411  | -1.027681 | 0.355822  |
| C | 9.425586  | -2.878858 | -0.585500 |
| C | 6.196204  | 2.042726  | -0.006153 |
| C | 5.452099  | 0.426273  | 1.650800  |
| C | 9.292868  | -1.840751 | 0.364862  |
| C | 6.649222  | 2.384026  | -1.311197 |
| C | 6.082934  | 3.066024  | 0.957157  |
| C | 5.369665  | 1.459823  | 2.634917  |
| O | 5.251069  | -0.892321 | 2.059404  |
| C | 6.955878  | 3.679247  | -1.627916 |
| C | 6.402237  | 4.405484  | 0.603161  |
| C | 5.670525  | 2.749396  | 2.276605  |
| C | 5.036006  | 1.158949  | 4.071680  |
| C | 6.828433  | 4.703617  | -0.661849 |
| C | 2.773121  | -0.055378 | -1.321526 |
| C | 3.918156  | -1.336519 | 1.938337  |
| C | -2.824838 | 0.189415  | -1.332311 |
| C | -3.979194 | 1.199854  | 2.010389  |
| H | 10.095344 | 1.511195  | 1.365498  |
| H | -8.085187 | 0.066558  | 1.182282  |
| H | -8.646529 | 3.996448  | -1.838516 |
| H | 10.375692 | 3.470592  | -0.129427 |
| H | -6.554854 | 3.478026  | -2.935368 |
| H | -6.807712 | -1.435604 | -2.151728 |
| H | -7.317321 | -3.730362 | -2.945576 |
| H | -6.119603 | -5.352449 | 0.858968  |
| H | -5.410463 | -3.878570 | 2.648205  |
| H | -6.965647 | -5.683131 | -1.457078 |
| H | -3.323476 | 1.603338  | -3.349402 |
| H | -4.687179 | 1.807094  | -4.497049 |
| H | -4.502024 | -0.554213 | 4.145814  |
| H | -5.798084 | -1.717984 | 4.557155  |
| H | -2.882185 | 5.036775  | -3.941783 |
| H | -2.309793 | 3.499468  | -4.665849 |
| H | -3.068447 | 4.996488  | -1.272296 |
| H | -0.539264 | 2.381113  | -3.584767 |
| H | -1.653855 | 4.588063  | 0.734394  |
| H | 0.874451  | 1.963148  | -1.579670 |
| H | 0.426822  | 0.822110  | 0.694460  |
| H | 0.767175  | 5.082458  | 1.348333  |
| H | 1.881507  | 0.406881  | 2.657577  |
| H | 2.187622  | 4.660706  | 3.337188  |
| H | 2.251724  | 2.154616  | 5.238995  |
| H | 3.581263  | 3.160703  | 4.579004  |
| H | -2.502680 | -1.200418 | 4.832151  |
| H | -2.288215 | -2.930446 | 5.252250  |
| H | -1.952736 | -4.617555 | 3.362401  |

|   |           |           |           |
|---|-----------|-----------|-----------|
| H | -1.758947 | -0.356567 | 2.715607  |
| H | -0.650951 | -4.993554 | 1.276173  |
| H | -0.408544 | -0.719275 | 0.668262  |
| H | 1.746443  | -4.434093 | 0.550369  |
| H | -0.962124 | -1.848384 | -1.596839 |
| H | 3.078240  | -4.762453 | -1.526894 |
| H | 0.369551  | -2.181244 | -3.668591 |
| H | 2.139344  | -3.176337 | -4.841461 |
| H | 2.745448  | -4.742639 | -4.213114 |
| H | 3.204518  | -1.344942 | -3.437584 |
| H | 4.536005  | -1.460668 | -4.634349 |
| H | 6.431437  | -3.255319 | -3.263287 |
| H | 8.543987  | -3.878605 | -2.268394 |
| H | 8.084210  | -0.226233 | 1.097296  |
| H | 10.313709 | -3.518418 | -0.557560 |
| H | 10.082194 | -1.696682 | 1.109941  |
| H | 6.739952  | 1.588291  | -2.061372 |
| H | 7.302049  | 3.936560  | -2.634384 |
| H | 6.301764  | 5.190732  | 1.360895  |
| H | 5.606190  | 3.558897  | 3.016019  |
| H | 5.374379  | 0.149339  | 4.367105  |
| H | 5.529730  | 1.893853  | 4.739307  |
| H | 7.075403  | 5.733439  | -0.939495 |
| H | 2.166413  | 0.858538  | -1.382869 |
| H | 2.348085  | -0.836407 | -1.973569 |
| H | 2.802318  | -0.418880 | -0.282946 |
| H | 3.601934  | -1.388918 | 0.885306  |
| H | 3.959484  | -2.338656 | 2.371361  |
| H | 3.204698  | -0.706215 | 2.494119  |
| H | -2.414546 | 1.007829  | -1.946806 |
| H | -2.847545 | 0.497527  | -0.276066 |
| H | -2.211256 | -0.713644 | -1.446120 |
| H | -3.203529 | 0.589964  | 2.503751  |
| H | -4.065070 | 2.172085  | 2.501285  |
| H | -3.708058 | 1.329278  | 0.951671  |

(RR) -11 (-0.26817776)

|   |           |           |           |
|---|-----------|-----------|-----------|
| C | -9.487029 | -3.699121 | -0.399529 |
| C | -8.561525 | -2.744719 | -0.075779 |
| C | -7.354719 | -2.623562 | -0.819487 |
| C | -7.131730 | -3.507111 | -1.894836 |
| C | -8.107938 | -4.490813 | -2.212261 |
| C | -9.259160 | -4.583160 | -1.479188 |
| C | -6.364023 | -1.642783 | -0.503719 |
| C | -5.933497 | -3.413153 | -2.647934 |
| C | -4.978868 | -2.473161 | -2.349517 |
| C | -5.199497 | -1.579104 | -1.255233 |
| C | -6.586944 | -0.739457 | 0.644457  |
| C | -6.015969 | -1.083993 | 1.910320  |
| C | -7.339848 | 0.418491  | 0.531004  |
| C | -5.267552 | -2.279026 | 2.100228  |
| C | -6.211904 | -0.228328 | 3.013331  |
| C | -7.480754 | 1.316831  | 1.634959  |
| C | -4.754095 | -2.593015 | 3.329135  |
| C | -5.669076 | -0.575512 | 4.280533  |
| C | -6.937817 | 0.979242  | 2.848800  |
| C | -4.957125 | -1.733601 | 4.433097  |
| O | -8.098497 | 0.651708  | -0.614668 |
| O | -4.185081 | -0.719606 | -0.834273 |
| C | -3.748665 | -2.402895 | -3.212195 |
| C | -8.182986 | 2.641548  | 1.494265  |
| O | -2.549256 | -2.746156 | -2.534674 |
| C | -2.174646 | -4.055439 | -2.410901 |

|   |           |           |           |
|---|-----------|-----------|-----------|
| C | -0.865686 | -4.197652 | -1.715345 |
| C | 0.243770  | -3.471341 | -2.148850 |
| C | -0.753493 | -5.062705 | -0.626788 |
| C | 1.454233  | -3.589676 | -1.478579 |
| C | 0.455836  | -5.169421 | 0.050135  |
| C | 1.562843  | -4.420951 | -0.360339 |
| C | 2.824879  | -4.478100 | 0.390009  |
| C | 4.049917  | -4.530736 | -0.280622 |
| C | 2.806364  | -4.450285 | 1.788124  |
| C | 5.241953  | -4.542187 | 0.434584  |
| C | 3.995800  | -4.457432 | 2.505290  |
| C | 5.214579  | -4.493791 | 1.827431  |
| C | 6.488960  | -4.529992 | 2.593682  |
| O | 7.007982  | -3.457561 | 3.267402  |
| C | -6.406550 | 4.229120  | 1.889291  |
| C | -5.103955 | 4.616729  | 1.284423  |
| O | -7.275223 | 3.627781  | 1.010053  |
| C | -4.464611 | 5.786293  | 1.698461  |
| C | -4.485282 | 3.773681  | 0.358681  |
| C | -3.198748 | 6.094819  | 1.213374  |
| C | -3.219495 | 4.081442  | -0.121079 |
| C | -2.561972 | 5.235512  | 0.314947  |
| C | -1.194129 | 5.505114  | -0.147579 |
| C | -0.196237 | 5.835199  | 0.773074  |
| C | -0.871877 | 5.387957  | -1.502328 |
| C | 1.120452  | 5.987493  | 0.355001  |
| C | 0.441559  | 5.548519  | -1.923549 |
| C | 1.446655  | 5.818491  | -0.991305 |
| C | 2.855385  | 5.871278  | -1.467816 |
| O | 3.754922  | 5.387426  | -0.552818 |
| C | 5.042000  | 4.947337  | -0.976934 |
| C | 5.034513  | 3.453938  | -1.177133 |
| C | 4.208897  | 2.921565  | -2.135668 |
| C | 5.857188  | 2.575108  | -0.404287 |
| C | 4.111884  | 1.520987  | -2.329354 |
| C | 5.788241  | 1.199644  | -0.571161 |
| O | 6.853819  | 3.088154  | 0.423740  |
| C | 4.885400  | 0.650978  | -1.535243 |
| C | 3.222036  | 0.988040  | -3.302122 |
| C | 6.644815  | 0.273563  | 0.199335  |
| C | 4.727846  | -0.751757 | -1.713991 |
| C | 3.086201  | -0.365275 | -3.445050 |
| C | 7.999401  | 0.075703  | -0.216356 |
| C | 6.156138  | -0.438024 | 1.283101  |
| C | 3.838532  | -1.241956 | -2.630366 |
| C | 8.554382  | 0.756040  | -1.335515 |
| C | 8.815189  | -0.823675 | 0.499415  |
| C | 6.973643  | -1.382100 | 1.982199  |
| O | 4.804578  | -0.329762 | 1.614590  |
| C | 9.856741  | 0.550355  | -1.702033 |
| C | 10.166707 | -1.017414 | 0.103187  |
| C | 8.281218  | -1.542507 | 1.600194  |
| C | 6.414584  | -2.177457 | 3.130850  |
| C | 10.674321 | -0.343914 | -0.974030 |
| O | 3.252098  | 6.285271  | -2.539262 |
| O | -6.759071 | 4.413227  | 3.036712  |
| O | -2.878936 | -4.939667 | -2.854550 |
| O | 7.217172  | -5.483393 | 2.763515  |
| C | 6.400130  | 3.621066  | 1.647567  |
| C | 4.548826  | 0.496618  | 2.727943  |
| C | -4.003821 | 0.421701  | -1.640134 |
| C | -7.467560 | 1.433233  | -1.601954 |
| H | 10.415351 | -3.787836 | 0.174526  |

|   |           |           |           |
|---|-----------|-----------|-----------|
| H | -8.737749 | -2.053963 | 0.758303  |
| H | -7.918684 | -5.172123 | -3.049807 |
| H | 10.013938 | -5.339278 | -1.718752 |
| H | -5.776030 | -4.120355 | -3.474214 |
| H | -5.107055 | -2.942497 | 1.241065  |
| H | -4.179752 | -3.514539 | 3.470318  |
| H | -5.831477 | 0.100412  | 5.128054  |
| H | -7.051644 | 1.648538  | 3.712971  |
| H | -4.537976 | -2.006585 | 5.406997  |
| H | -3.873061 | -2.997730 | -4.138124 |
| H | -3.525870 | -1.353301 | -3.497570 |
| H | -8.944674 | 2.641521  | 0.694838  |
| H | -8.671971 | 2.944262  | 2.440199  |
| H | 0.163084  | -2.798285 | -3.010174 |
| H | -1.618217 | -5.653791 | -0.303334 |
| H | 2.327956  | -3.011285 | -1.826149 |
| H | 0.539574  | -5.843087 | 0.911160  |
| H | 4.073668  | -4.559529 | -1.377049 |
| H | 1.848865  | -4.413070 | 2.321356  |
| H | 6.199912  | -4.588415 | -0.096084 |
| H | 3.974525  | -4.436667 | 3.600938  |
| H | -4.954118 | 6.452363  | 2.419208  |
| H | -4.987973 | 2.858070  | 0.015129  |
| H | -2.693449 | 7.009175  | 1.545786  |
| H | -2.728344 | 3.404224  | -0.831485 |
| H | -0.451101 | 5.955682  | 1.832740  |
| H | -1.656816 | 5.159534  | -2.232738 |
| H | 1.899099  | 6.225426  | 1.088911  |
| H | 0.691816  | 5.454100  | -2.987333 |
| H | 5.663407  | 5.263837  | -0.115575 |
| H | 5.413221  | 5.461090  | -1.884458 |
| H | 3.596638  | 3.580972  | -2.765673 |
| H | 2.644558  | 1.679841  | -3.925952 |
| H | 5.313997  | -1.435327 | -1.085837 |
| H | 2.393707  | -0.784093 | -4.182597 |
| H | 3.678890  | -2.327194 | -2.721814 |
| H | 7.920808  | 1.455792  | -1.894763 |
| H | 10.279869 | 1.078431  | -2.563027 |
| H | 10.789932 | -1.715546 | 0.674117  |
| H | 8.936452  | -2.244338 | 2.134136  |
| H | 6.681809  | -1.699219 | 4.091317  |
| H | 5.311029  | -2.264616 | 3.075750  |
| H | 11.714403 | -0.489782 | -1.283579 |
| H | 7.331590  | 3.801061  | 2.189888  |
| H | 5.862876  | 4.567718  | 1.491660  |
| H | 5.762666  | 2.921288  | 2.206194  |
| H | 4.855393  | 1.537226  | 2.547877  |
| H | 3.462251  | 0.435103  | 2.826856  |
| H | 5.035056  | 0.128286  | 3.639538  |
| H | -4.919786 | 1.027158  | -1.716851 |
| H | -3.230705 | 0.978821  | -1.102955 |
| H | -3.653666 | 0.162053  | -2.650202 |
| H | -8.254035 | 1.550696  | -2.351464 |
| H | -6.601655 | 0.913618  | -2.037977 |
| H | -7.147424 | 2.412758  | -1.226472 |

**C<sub>60</sub>: (RR) -8 (1.58650426)**

|   |           |           |           |
|---|-----------|-----------|-----------|
| C | 10.106431 | -2.513493 | 2.581774  |
| C | 10.194027 | -1.586688 | 1.579097  |
| C | 9.789899  | -1.910967 | 0.253677  |
| C | 9.296309  | -3.205638 | -0.004986 |
| C | 9.214075  | -4.151473 | 1.053450  |
| C | 9.610388  | -3.811040 | 2.317615  |

|   |           |           |           |
|---|-----------|-----------|-----------|
| H | 10.420670 | -2.260534 | 3.599831  |
| H | 10.583566 | -0.580340 | 1.778737  |
| C | 9.868544  | -0.967151 | -0.816628 |
| C | 8.882420  | -3.551681 | -1.316309 |
| H | 8.827496  | -5.154033 | 0.837496  |
| H | 9.548796  | -4.535739 | 3.136055  |
| C | 8.954998  | -2.651569 | -2.349355 |
| C | 9.464577  | -1.340972 | -2.088478 |
| H | 8.479527  | -4.561627 | -1.495809 |
| C | 10.368220 | 0.395797  | -0.541580 |
| C | 11.773585 | 0.651379  | -0.593106 |
| C | 9.497535  | 1.431529  | -0.244286 |
| C | 12.717743 | -0.373022 | -0.883143 |
| C | 12.245845 | 1.956680  | -0.347367 |
| C | 9.975878  | 2.758187  | -0.009871 |
| C | 14.057289 | -0.096890 | -0.921665 |
| H | 12.349927 | -1.390274 | -1.067481 |
| C | 13.642469 | 2.219169  | -0.393875 |
| C | 11.326046 | 2.997728  | -0.058937 |
| C | 14.526552 | 1.213923  | -0.675211 |
| H | 14.780636 | -0.888831 | -1.142349 |
| H | 13.994446 | 3.239204  | -0.201055 |
| H | 11.711382 | 4.010314  | 0.119340  |
| H | 15.602884 | 1.411235  | -0.711941 |
| O | 8.121217  | 1.207558  | -0.275858 |
| O | 9.451769  | -0.399195 | -3.116852 |
| C | 8.510906  | -3.059527 | -3.731423 |
| H | 9.110961  | -3.927138 | -4.071954 |
| C | 9.035882  | 3.893310  | 0.304933  |
| H | 7.972523  | 3.591996  | 0.231255  |
| H | 9.221539  | 4.272135  | 1.325664  |
| H | 9.177335  | 4.062795  | -2.314930 |
| C | 8.801475  | 4.976709  | -1.815256 |
| H | 9.297085  | 5.853306  | -2.268138 |
| O | 9.270146  | 5.047125  | -0.480008 |
| C | 7.304782  | 5.075453  | -1.922057 |
| C | 6.537965  | 3.922684  | -2.097501 |
| C | 6.679020  | 6.320670  | -1.854460 |
| C | 5.155746  | 4.010949  | -2.203955 |
| H | 7.027504  | 2.940922  | -2.147100 |
| C | 5.297159  | 6.418364  | -1.958513 |
| H | 7.281961  | 7.225360  | -1.715049 |
| C | 4.530862  | 5.260918  | -2.132630 |
| H | 4.808207  | 7.396733  | -1.903725 |
| H | 8.635407  | -2.247488 | -4.470478 |
| H | 4.556835  | 3.104319  | -2.342874 |
| C | 3.122382  | 5.347311  | -2.231648 |
| C | 1.929286  | 5.404011  | -2.310228 |
| O | 7.122743  | -3.300325 | -3.832710 |
| C | 0.567034  | 5.447480  | -2.394241 |
| C | -0.627836 | 5.466737  | -2.463332 |
| C | -2.040121 | 5.468470  | -2.543202 |
| C | -2.692377 | 6.314489  | -3.446244 |
| C | -2.783597 | 4.612553  | -1.722769 |
| C | -4.079176 | 6.296863  | -3.530143 |
| H | -2.110381 | 6.983499  | -4.088990 |
| C | -4.169391 | 4.604718  | -1.809834 |
| H | -2.273098 | 3.944913  | -1.015044 |
| C | -4.822539 | 5.443971  | -2.713856 |
| H | -4.588333 | 6.952811  | -4.245738 |
| H | -4.754586 | 3.928985  | -1.175270 |
| C | -6.320230 | 5.431605  | -2.801590 |
| H | -6.700692 | 6.245576  | -3.450307 |

|   |           |           |           |
|---|-----------|-----------|-----------|
| H | -6.769536 | 5.574143  | -1.793262 |
| C | 7.583293  | 0.843880  | 0.978134  |
| H | 8.050567  | -0.066111 | 1.376726  |
| H | 7.674707  | 1.655058  | 1.710095  |
| H | 6.531426  | 0.661954  | 0.744667  |
| C | 10.660968 | -0.343804 | -3.843745 |
| H | 11.519067 | -0.110775 | -3.199550 |
| H | 10.852984 | -1.277067 | -4.386242 |
| H | 10.480507 | 0.471510  | -4.548365 |
| C | -9.953793 | -0.067983 | -0.822489 |
| C | -9.468631 | 1.327365  | -0.846066 |
| C | 11.351132 | -0.325105 | -0.981606 |
| C | -9.079654 | -1.130024 | -0.660005 |
| C | -9.438433 | 2.077611  | 0.369771  |
| C | -9.036199 | 1.916457  | -2.023757 |
| C | 12.300335 | 0.724333  | -1.131847 |
| C | 11.810425 | -1.657713 | -0.984429 |
| C | -9.543692 | -2.482620 | -0.684678 |
| O | -7.708634 | -0.886514 | -0.570112 |
| C | -9.873086 | 1.528055  | 1.608442  |
| C | -8.963326 | 3.404504  | 0.348416  |
| C | -8.551682 | 3.261792  | -2.045247 |
| O | -8.969476 | 1.160417  | -3.193601 |
| C | 13.632206 | 0.445541  | -1.275673 |
| H | 11.943346 | 1.761901  | -1.121578 |
| C | 13.198995 | -1.922447 | -1.136868 |
| C | 10.885484 | -2.723738 | -0.838334 |
| C | -8.592266 | -3.640360 | -0.526930 |
| C | -7.248056 | -0.797636 | 0.762148  |
| C | -9.829882 | 2.272502  | 2.755566  |
| H | 10.249741 | 0.497381  | 1.623285  |
| C | -8.926931 | 4.158018  | 1.553659  |
| C | -8.524200 | 3.974816  | -0.873212 |
| C | -8.087317 | 3.909039  | -3.325630 |
| C | 10.151679 | 1.207667  | -3.964080 |
| C | 14.088227 | -0.892730 | -1.279530 |
| H | 14.359550 | 1.256425  | -1.387641 |
| H | 13.540758 | -2.963952 | -1.137758 |
| H | 11.261125 | -3.755393 | -0.856302 |
| H | -7.533050 | -3.323882 | -0.600661 |
| H | -8.744147 | -4.128871 | 0.451978  |
| O | -8.842998 | -4.703345 | -1.426484 |
| H | -7.735505 | 0.020865  | 1.307692  |
| H | -7.391789 | -1.738754 | 1.306673  |
| H | -6.179134 | -0.592236 | 0.642301  |
| C | -9.350512 | 3.602565  | 2.729693  |
| H | 10.167227 | 1.846467  | 3.706280  |
| H | -8.553386 | 5.187901  | 1.521982  |
| H | -8.139165 | 5.007451  | -0.868557 |
| H | -8.690860 | 4.818027  | -3.521027 |
| H | -8.188640 | 3.238181  | -4.197829 |
| O | -6.700822 | 4.175884  | -3.355752 |
| H | 11.024430 | 0.850038  | -3.401918 |
| H | 10.350462 | 2.216205  | -4.345607 |
| H | -9.926575 | 0.529644  | -4.790774 |
| H | 15.158487 | -1.091655 | -1.396743 |
| C | -8.411023 | -4.483569 | -2.758173 |
| H | -9.324053 | 4.178513  | 3.660499  |
| H | -8.812620 | -3.527759 | -3.147163 |
| H | -8.906822 | -5.314725 | -3.289614 |
| C | -6.916460 | -4.545445 | -2.910918 |
| C | -6.169379 | -3.368060 | -2.969836 |
| C | -6.272678 | -5.780222 | -2.997494 |

|   |           |           |           |
|---|-----------|-----------|-----------|
| C | -4.788097 | -3.421929 | -3.106619 |
| H | -6.673081 | -2.394896 | -2.901369 |
| C | -4.891489 | -5.843719 | -3.132565 |
| H | -6.860483 | -6.704323 | -2.952785 |
| C | -4.144310 | -4.662075 | -3.182450 |
| H | -4.204348 | -2.496042 | -3.151523 |
| H | -4.387987 | -6.814152 | -3.196258 |
| C | -2.734888 | -4.714410 | -3.291507 |
| C | -1.540203 | -4.741833 | -3.361235 |
| C | -0.175778 | -4.751458 | -3.415753 |
| C | 1.020875  | -4.741888 | -3.443849 |
| C | 2.435053  | -4.715860 | -3.464898 |
| C | 3.134293  | -5.372894 | -4.482674 |
| C | 3.132930  | -4.026232 | -2.466692 |
| C | 4.523061  | -5.336745 | -4.500103 |
| H | 2.587554  | -5.909612 | -5.265265 |
| C | 4.521241  | -3.999183 | -2.489485 |
| H | 2.584176  | -3.505864 | -1.669719 |
| C | 5.221578  | -4.653418 | -3.504338 |
| H | 5.069437  | -5.844536 | -5.303367 |
| H | 5.071682  | -3.454466 | -1.713720 |
| C | 6.721747  | -4.630399 | -3.518596 |
| H | 7.134864  | -5.325722 | -4.276456 |
| H | 7.124920  | -4.942080 | -2.529123 |
| C | 0.781248  | -3.307768 | 0.982330  |
| C | 1.423963  | -3.452211 | 2.282355  |
| C | -0.591290 | -3.445279 | 0.870947  |
| C | 1.470371  | -2.249697 | 0.253173  |
| C | 2.508788  | -2.482049 | 2.358622  |
| C | 0.662361  | -3.728352 | 3.404534  |
| C | -1.349251 | -2.530942 | 0.026280  |
| C | -1.393558 | -3.736163 | 2.052471  |
| C | 2.536763  | -1.737994 | 1.105727  |
| C | 0.748876  | -1.379632 | -0.546336 |
| C | 2.777416  | -1.836975 | 3.553282  |
| C | 0.945121  | -3.048829 | 4.662443  |
| C | -0.782984 | -3.874182 | 3.286631  |
| C | -0.696568 | -1.525072 | -0.664228 |
| C | -2.620121 | -2.256906 | 0.685160  |
| C | -2.647317 | -3.001605 | 1.937648  |
| C | 2.830845  | -0.385615 | 1.111171  |
| C | 1.059000  | 0.044467  | -0.541213 |
| C | 1.975382  | -2.127634 | 4.734939  |
| C | 3.087603  | -0.412991 | 3.558743  |
| C | -0.325429 | -2.774563 | 5.321908  |
| C | -1.393527 | -3.284601 | 4.471537  |
| C | -1.279910 | -0.191139 | -0.732224 |
| C | -3.174557 | -0.990601 | 0.620096  |
| C | -3.227232 | -2.442115 | 3.062693  |
| C | 3.113561  | 0.293905  | 2.369253  |
| C | 2.073275  | 0.528751  | 0.266053  |
| C | -0.194843 | 0.778905  | -0.655948 |
| C | 1.789807  | -0.883242 | 5.470693  |
| C | 2.477292  | 0.176510  | 4.743762  |
| C | -0.501615 | -1.592945 | 6.020520  |
| C | -2.583923 | -2.587145 | 4.362444  |
| C | -2.486473 | 0.069149  | -0.106436 |
| C | -3.786788 | -0.401138 | 1.804660  |
| C | -3.810259 | -1.108073 | 2.994768  |
| C | 2.530489  | 1.628074  | 2.301634  |
| C | 1.887586  | 1.773199  | 1.001774  |
| C | -0.371027 | 1.960620  | 0.042203  |
| C | 0.583395  | -0.622808 | 6.096848  |



|   |           |           |          |
|---|-----------|-----------|----------|
| C | 1.923574  | 1.443210  | 4.679430 |
| C | -1.755228 | -0.858492 | 5.905627 |
| C | -2.769400 | -1.342738 | 5.097949 |
| C | -2.671752 | 1.313249  | 0.629494 |
| C | -3.474289 | 1.022844  | 1.810818 |
| C | -3.527204 | -0.428681 | 4.252693 |
| C | 1.950998  | 2.187900  | 3.426860 |
| C | 0.696957  | 2.470166  | 0.893059 |
| C | -1.642544 | 2.236602  | 0.700245 |
| C | 0.000309  | 0.711221  | 6.029213 |
| C | 0.653037  | 1.717498  | 5.338830 |
| C | -1.445048 | 0.565568  | 5.911012 |
| C | -3.205434 | 1.667967  | 3.005304 |
| C | -3.232721 | 0.923531  | 4.257926 |
| C | 0.697380  | 2.922378  | 3.312093 |
| C | 0.086542  | 3.059633  | 2.077864 |
| C | -1.358822 | 2.914125  | 1.959637 |
| C | -0.104834 | 2.631619  | 4.493668 |
| C | -2.164670 | 1.433529  | 5.108456 |
| C | -2.120500 | 2.638137  | 3.081596 |
| C | -1.477260 | 2.493266  | 4.381407 |

**C<sub>60</sub>: (RR) -9 (1.34900475)**

|   |           |           |           |
|---|-----------|-----------|-----------|
| C | 8.798097  | 2.332308  | 3.828862  |
| C | 9.282734  | 1.384450  | 2.968640  |
| C | 8.540045  | 0.201486  | 2.700352  |
| C | 7.294502  | 0.024225  | 3.335366  |
| C | 6.811787  | 1.023163  | 4.223993  |
| C | 7.548442  | 2.151098  | 4.463906  |
| H | 9.374856  | 3.239775  | 4.036253  |
| H | 10.256046 | 1.517111  | 2.479471  |
| C | 9.018668  | -0.808871 | 1.808740  |
| C | 6.528828  | -1.144787 | 3.082125  |
| H | 5.842968  | 0.871836  | 4.713826  |
| H | 7.181067  | 2.921884  | 5.149333  |
| C | 6.990236  | -2.124637 | 2.243034  |
| C | 8.263224  | -1.950908 | 1.608639  |
| H | 5.552876  | -1.241190 | 3.576875  |
| C | 10.298472 | -0.607249 | 1.098941  |
| C | 11.520838 | -1.017592 | 1.715525  |
| C | 10.329424 | -0.042447 | -0.165399 |
| C | 11.556044 | -1.576439 | 3.023595  |
| C | 12.732866 | -0.861251 | 1.012735  |
| C | 11.555915 | 0.090201  | -0.888317 |
| C | 12.743816 | -1.954309 | 3.588355  |
| H | 10.612751 | -1.689905 | 3.572997  |
| C | 13.954028 | -1.263392 | 1.619898  |
| C | 12.726701 | -0.309789 | -0.294888 |
| C | 13.957028 | -1.797907 | 2.879231  |
| H | 12.767137 | -2.380950 | 4.596746  |
| H | 14.888410 | -1.137897 | 1.060380  |
| H | 13.680290 | -0.214347 | -0.831588 |
| H | 14.894951 | -2.108931 | 3.351008  |
| O | 9.135099  | 0.308007  | -0.795655 |
| O | 8.671506  | -2.911509 | 0.682610  |
| C | 6.208752  | -3.374350 | 1.944654  |
| H | 6.704418  | -4.251145 | 2.407926  |
| C | 11.583290 | 0.673095  | -2.275593 |
| H | 10.569439 | 0.786394  | -2.707492 |
| H | 12.068788 | 1.665877  | -2.262104 |
| C | 11.919362 | -1.104510 | -3.871917 |
| O | 12.425401 | -0.053750 | -3.156038 |
| C | 10.478640 | -1.474574 | -3.885766 |

|   |           |           |           |
|---|-----------|-----------|-----------|
| C | 10.032642 | -2.542373 | -3.108094 |
| C | 9.589590  | -0.769580 | -4.698036 |
| C | 8.686839  | -2.889421 | -3.117788 |
| H | 10.736789 | -3.099725 | -2.479655 |
| C | 8.244523  | -1.116232 | -4.714384 |
| H | 9.950248  | 0.055997  | -5.321841 |
| C | 7.788558  | -2.169838 | -3.913618 |
| H | 7.541660  | -0.562835 | -5.346426 |
| H | 6.143336  | -3.542373 | 0.852920  |
| H | 8.329066  | -3.712934 | -2.489486 |
| C | 6.412124  | -2.496175 | -3.886623 |
| C | 5.246930  | -2.764553 | -3.830909 |
| O | 4.832038  | -3.292107 | 2.273248  |
| C | 3.918974  | -3.068241 | -3.733607 |
| C | 2.757456  | -3.333704 | -3.618727 |
| C | 1.389741  | -3.651360 | -3.448192 |
| C | 0.938713  | -4.955044 | -3.684742 |
| C | 0.492471  | -2.666484 | -3.021181 |
| C | -0.397089 | -5.272991 | -3.475713 |
| H | 1.638868  | -5.723702 | -4.030006 |
| C | -0.841645 | -2.989855 | -2.808825 |
| H | 0.836239  | -1.638665 | -2.843556 |
| C | -1.287431 | -4.294995 | -3.025002 |
| H | -0.753724 | -6.293093 | -3.663982 |
| H | -1.533769 | -2.209724 | -2.461190 |
| C | -2.705463 | -4.674153 | -2.782422 |
| C | 8.770426  | 1.656362  | -0.587840 |
| H | 8.661233  | 1.893758  | 0.478499  |
| H | 9.489856  | 2.345106  | -1.046510 |
| H | 7.804840  | 1.725335  | -1.094415 |
| C | 9.506042  | -3.908943 | 1.233284  |
| H | 10.405591 | -3.485113 | 1.698678  |
| H | 8.971152  | -4.527920 | 1.963302  |
| H | 9.774947  | -4.504268 | 0.357049  |
| C | -9.035149 | -2.056072 | -0.815551 |
| C | -7.812701 | -2.314130 | -1.603608 |
| C | 10.194496 | -2.863250 | -1.035646 |
| C | -9.071361 | -1.059442 | 0.144790  |
| C | -7.646917 | -1.683275 | -2.875739 |
| C | -6.819735 | -3.151061 | -1.125202 |
| C | 10.222036 | -3.893650 | -2.016237 |
| C | 11.350775 | -2.631913 | -0.263509 |
| C | 10.232109 | -0.852108 | 0.954932  |
| O | -7.922809 | -0.310463 | 0.403169  |
| C | -8.631872 | -0.814547 | -3.421737 |
| C | -6.472160 | -1.926748 | -3.615209 |
| C | -5.621678 | -3.391762 | -1.872661 |
| O | -6.921270 | -3.688146 | 0.158222  |
| C | 11.351451 | -4.641851 | -2.209653 |
| H | -9.322605 | -4.070247 | -2.619807 |
| C | 12.512219 | -3.421924 | -0.483145 |
| C | 11.346309 | -1.620997 | 0.732817  |
| C | 10.237962 | 0.203373  | 2.027543  |
| C | -7.883110 | 0.907457  | -0.310494 |
| C | -8.443531 | -0.227556 | -4.643668 |
| H | -9.549054 | -0.631515 | -2.847683 |
| C | -6.300028 | -1.306621 | -4.882719 |
| C | -5.469508 | -2.785663 | -3.092166 |
| C | -4.580877 | -4.310521 | -1.295210 |
| C | -7.556577 | -4.948096 | 0.198869  |
| C | 12.510317 | -4.404284 | -1.435441 |
| H | 11.369779 | -5.431791 | -2.967984 |
| H | 13.404598 | -3.229477 | 0.123951  |

|   |           |           |           |
|---|-----------|-----------|-----------|
| H | 12.254615 | -1.471284 | 1.332324  |
| H | -9.212754 | 0.494911  | 2.329538  |
| H | 10.768201 | 1.105890  | 1.672552  |
| O | 11.005406 | -0.161267 | 3.162923  |
| H | -7.991451 | 0.758040  | -1.392750 |
| H | -8.652179 | 1.603684  | 0.044702  |
| H | -6.883999 | 1.293422  | -0.080061 |
| C | -7.264922 | -0.475618 | -5.383497 |
| H | -9.205449 | 0.438282  | -5.062377 |
| H | -5.383901 | -1.508208 | -5.449886 |
| H | -4.566728 | -2.955472 | -3.693355 |
| H | -4.868478 | -5.364964 | -1.480884 |
| H | -4.476985 | -4.161063 | -0.203648 |
| O | -3.255237 | -4.022412 | -1.711498 |
| H | -8.560085 | -4.920954 | -0.245472 |
| H | -6.954778 | -5.719673 | -0.295586 |
| H | -7.618978 | -5.145055 | 1.272931  |
| H | 13.402500 | -5.015091 | -1.608495 |
| C | 10.429095 | -0.895081 | 4.164522  |
| H | -7.136746 | 0.003087  | -6.359878 |
| C | -8.981271 | -1.234882 | 4.204286  |
| C | -8.540072 | -2.456604 | 3.697917  |
| C | -8.079161 | -0.337395 | 4.776433  |
| C | -7.186998 | -2.772742 | 3.734645  |
| H | -9.254609 | -3.161690 | 3.257679  |
| C | -6.727054 | -0.651874 | 4.820862  |
| H | -8.435089 | 0.612806  | 5.190216  |
| C | -6.276862 | -1.866202 | 4.288866  |
| H | -6.835521 | -3.720995 | 3.310643  |
| H | -6.013713 | 0.050938  | 5.264880  |
| C | -4.893285 | -2.161624 | 4.289626  |
| C | -3.718849 | -2.391339 | 4.263057  |
| C | -2.375641 | -2.630605 | 4.203030  |
| C | -1.196595 | -2.821243 | 4.123657  |
| C | 0.196866  | -3.030022 | 3.998731  |
| C | 0.770193  | -4.236943 | 4.413648  |
| C | 0.997645  | -2.025081 | 3.443054  |
| C | 2.135618  | -4.442992 | 4.257689  |
| H | 0.143605  | -5.018428 | 4.857279  |
| C | 2.361550  | -2.235038 | 3.289380  |
| H | 0.547256  | -1.076817 | 3.117604  |
| C | 2.929440  | -3.447555 | 3.685543  |
| H | 2.589435  | -5.386251 | 4.584399  |
| H | 2.990407  | -1.450465 | 2.850604  |
| C | 4.387004  | -3.689009 | 3.506651  |
| C | -0.460477 | 3.485407  | 3.140565  |
| C | -0.585444 | 4.917160  | 2.897838  |
| C | -1.581729 | 2.675504  | 3.096329  |
| C | 0.788371  | 3.034042  | 2.539980  |
| C | 0.586221  | 5.350572  | 2.147150  |
| C | -1.825531 | 5.466526  | 2.622952  |
| C | -1.513584 | 1.371510  | 2.449116  |
| C | -2.887858 | 3.254104  | 2.806940  |
| C | 1.435351  | 4.186764  | 1.926008  |
| C | 0.853318  | 1.795399  | 1.926085  |
| C | 0.458688  | 6.311593  | 1.159512  |
| C | -1.959875 | 6.478707  | 1.582900  |
| C | -3.006504 | 4.613470  | 2.576408  |
| C | -0.326855 | 0.940470  | 1.881291  |
| C | -2.777712 | 1.143841  | 1.760199  |
| C | -3.627008 | 2.307463  | 1.981196  |
| C | 2.114276  | 4.042955  | 0.728696  |
| C | 1.567928  | 1.644186  | 0.664899  |

|   |           |           |           |
|---|-----------|-----------|-----------|
| C | -0.847322 | 6.890305  | 0.870108  |
| C | 1.173623  | 6.160016  | -0.101567 |
| C | -3.223795 | 6.251159  | 0.893608  |
| C | -3.870547 | 5.098353  | 1.507597  |
| C | -0.342815 | 0.264239  | 0.589592  |
| C | -2.792059 | 0.499685  | 0.535599  |
| C | -4.448158 | 2.767695  | 0.966677  |
| C | 1.980087  | 5.055126  | -0.311405 |
| C | 2.182148  | 2.738713  | 0.081722  |
| C | 0.828612  | 0.698165  | -0.160894 |
| C | -0.939545 | 7.096430  | -0.569826 |
| C | 0.309464  | 6.645110  | -1.170342 |
| C | -3.311347 | 6.446876  | -0.473582 |
| C | -4.572316 | 4.199364  | 0.723525  |
| C | -1.542947 | 0.048660  | -0.064701 |
| C | -3.656252 | 0.984562  | -0.533044 |
| C | -4.465612 | 2.087874  | -0.323099 |
| C | 1.965140  | 4.376306  | -1.601130 |
| C | 2.090212  | 2.944634  | -1.358137 |
| C | 0.742147  | 0.892586  | -1.528536 |
| C | -2.139671 | 6.880511  | -1.224270 |
| C | 0.295313  | 6.000661  | -2.394967 |
| C | -4.050262 | 5.500102  | -1.299323 |
| C | -4.664448 | 4.405475  | -0.716252 |
| C | -1.635419 | 0.252625  | -1.505269 |
| C | -2.941313 | 0.832854  | -1.794032 |
| C | -4.597030 | 3.101269  | -1.363197 |
| C | 1.144557  | 4.836875  | -2.615903 |
| C | 1.388451  | 2.045718  | -2.142307 |
| C | -0.522186 | 0.665429  | -2.217737 |
| C | -2.154576 | 6.201791  | -2.514021 |
| C | -0.968629 | 5.773297  | -3.084213 |
| C | -3.335514 | 5.348742  | -2.560391 |
| C | -3.068539 | 1.793884  | -2.781517 |
| C | -3.917746 | 2.957601  | -2.560351 |
| C | 0.405451  | 3.890245  | -3.441658 |
| C | 0.524271  | 2.530829  | -3.210952 |
| C | -0.656641 | 1.678131  | -3.257339 |
| C | -0.900568 | 4.468916  | -3.731043 |
| C | -3.270927 | 4.110260  | -3.174526 |
| C | -1.896802 | 2.227476  | -3.532040 |
| C | -2.021905 | 3.659045  | -3.775153 |
| O | 11.276856 | -1.171622 | 4.984369  |
| O | -3.364332 | -5.487267 | -3.401222 |
| O | 12.823147 | -1.629546 | -4.484569 |
| O | 5.153738  | -4.200071 | 4.297996  |

**C<sub>60</sub>: (RR) -11 (1.02307266)**

|   |           |           |           |
|---|-----------|-----------|-----------|
| C | -7.546599 | -8.981565 | -1.887417 |
| C | -6.555099 | -8.140759 | -1.460536 |
| C | -6.873582 | -6.904971 | -0.831582 |
| C | -8.230357 | -6.564212 | -0.658943 |
| C | -9.243062 | -7.453902 | -1.110938 |
| C | -8.906265 | -8.635701 | -1.711893 |
| C | -5.862884 | -6.000517 | -0.380400 |
| C | -8.575667 | -5.334591 | -0.042072 |
| C | -7.609455 | -4.462428 | 0.393471  |
| C | -6.231882 | -4.802594 | 0.214420  |
| C | -4.441837 | -6.346368 | -0.592594 |
| C | -3.772866 | -5.825123 | -1.744946 |
| C | -3.748222 | -7.166788 | 0.282852  |
| C | -4.441136 | -5.010822 | -2.701322 |
| C | -2.414921 | -6.138422 | -1.957100 |

|   |           |           |           |
|---|-----------|-----------|-----------|
| C | -2.353997 | -7.427929 | 0.099787  |
| C | -3.780439 | -4.546841 | -3.806147 |
| C | -1.749412 | -5.645190 | -3.112448 |
| C | -1.718186 | -6.932373 | -1.010305 |
| C | -2.419776 | -4.867630 | -4.016512 |
| O | -4.431244 | -7.874327 | 1.270448  |
| O | -5.234446 | -3.872546 | 0.506077  |
| C | -8.044381 | -3.193095 | 1.073312  |
| C | -1.554095 | -8.206985 | 1.110247  |
| O | -7.722870 | -2.013556 | 0.351681  |
| C | -8.550229 | -1.560628 | -0.638366 |
| C | -8.061293 | -0.286471 | -1.234116 |
| C | -7.740385 | 0.795716  | -0.414233 |
| C | -7.925901 | -0.179579 | -2.618336 |
| C | -7.259780 | 1.971490  | -0.975555 |
| C | -7.432481 | 0.993925  | -3.176454 |
| C | -7.079897 | 2.070906  | -2.357953 |
| C | -6.495349 | 3.289331  | -2.934792 |
| C | -6.888645 | 4.551292  | -2.480935 |
| C | -5.514743 | 3.189612  | -3.926913 |
| C | -6.301455 | 5.698947  | -3.001230 |
| C | -4.923438 | 4.334287  | -4.445757 |
| C | -5.310559 | 5.589358  | -3.975513 |
| C | -4.698932 | 6.817731  | -4.549461 |
| O | -3.417921 | 7.226369  | -4.293940 |
| C | 0.016386  | -6.563100 | 1.924556  |
| C | -0.006429 | -5.256919 | 2.635977  |
| O | -1.095514 | -7.340547 | 2.144695  |
| C | 1.178917  | -4.717014 | 3.137528  |
| C | -1.198295 | -4.535691 | 2.735339  |
| C | 1.178451  | -3.448256 | 3.705981  |
| C | -1.195937 | -3.267737 | 3.300477  |
| C | -0.005118 | -2.709903 | 3.774938  |
| C | -0.010602 | -1.339286 | 4.303128  |
| C | 0.933193  | -0.411614 | 3.855607  |
| C | -0.987340 | -0.942627 | 5.220672  |
| C | 0.866619  | 0.912254  | 4.273702  |
| C | -1.050045 | 0.377593  | 5.646286  |
| C | -0.141403 | 1.316072  | 5.150130  |
| C | -0.312796 | 2.740860  | 5.543410  |
| O | 0.044619  | 3.622961  | 4.556173  |
| C | -0.456196 | 4.956744  | 4.571239  |
| C | -1.670473 | 5.059527  | 3.685038  |
| C | -2.785201 | 4.326567  | 4.007565  |
| C | -1.700381 | 5.892681  | 2.522578  |
| C | -3.935892 | 4.332798  | 3.180282  |
| C | -2.812158 | 5.923713  | 1.693400  |
| O | -0.674712 | 6.804775  | 2.281466  |
| C | -3.949134 | 5.115201  | 2.008306  |
| C | -5.066325 | 3.536521  | 3.512278  |
| C | -2.874785 | 6.793992  | 0.500209  |
| C | -5.096277 | 5.060230  | 1.168363  |
| C | -6.151293 | 3.497871  | 2.680611  |
| C | -3.185890 | 8.180083  | 0.669932  |
| C | -2.683543 | 6.292296  | -0.777072 |
| C | -6.157005 | 4.258412  | 1.489041  |
| C | -3.418144 | 8.751879  | 1.951535  |
| C | -3.270287 | 9.011153  | -0.465375 |
| C | -2.811146 | 7.129035  | -1.931156 |
| O | -2.494642 | 4.919923  | -0.947948 |
| C | -3.705788 | 10.083612 | 2.080090  |
| C | -3.565532 | 10.392764 | -0.306871 |
| C | -3.076425 | 8.463867  | -1.760147 |

|   |           |           |           |
|---|-----------|-----------|-----------|
| C | -2.641354 | 6.559175  | -3.313504 |
| C | -3.777980 | 10.915431 | 0.939467  |
| O | -0.719399 | 3.163875  | 6.607741  |
| O | 0.906093  | -6.990060 | 1.216670  |
| O | -9.554250 | -2.178604 | -0.929502 |
| O | -5.205700 | 7.595793  | -5.327892 |
| C | 0.512808  | 6.247893  | 1.764432  |
| C | -1.155064 | 4.547521  | -1.181952 |
| C | -4.947973 | -3.722000 | 1.877262  |
| C | -4.490064 | -7.242395 | 2.527757  |
| H | -7.297028 | -9.932578 | -2.369576 |
| H | -5.499086 | -8.408733 | -1.590596 |
| H | 10.293502 | -7.173500 | -0.971532 |
| H | -9.682016 | -9.324180 | -2.062594 |
| H | -9.639821 | -5.084621 | 0.070874  |
| H | -5.495988 | -4.759056 | -2.533898 |
| H | -4.299609 | -3.921395 | -4.539831 |
| H | -0.693755 | -5.899095 | -3.262879 |
| H | -0.651594 | -7.138052 | -1.176907 |
| H | -1.912573 | -4.486140 | -4.908639 |
| H | -9.120310 | -3.225595 | 1.334020  |
| H | -7.463407 | -3.024698 | 2.004354  |
| H | -2.168253 | -8.921149 | 1.686476  |
| H | -0.728652 | -8.766955 | 0.630024  |
| H | -7.854953 | 0.719861  | 0.673203  |
| H | -8.204014 | -1.020584 | -3.264166 |
| H | -7.006631 | 2.823681  | -0.320981 |
| H | -7.318140 | 1.072831  | -4.264063 |
| H | -7.661695 | 4.639110  | -1.707485 |
| H | -5.204022 | 2.202984  | -4.290966 |
| H | -6.616939 | 6.686481  | -2.645313 |
| H | -4.156165 | 4.249468  | -5.223845 |
| H | 2.113356  | -5.286796 | 3.067075  |
| H | -2.139724 | -4.959166 | 2.356600  |
| H | 2.112233  | -3.020029 | 4.089257  |
| H | -2.131087 | -2.696045 | 3.356824  |
| H | 1.721139  | -0.722007 | 3.153618  |
| H | -1.711482 | -1.674254 | 5.597650  |
| H | 1.600592  | 1.635248  | 3.898449  |
| H | -1.818954 | 0.686172  | 6.365151  |
| H | 0.416978  | 5.510561  | 4.172380  |
| H | -0.679805 | 5.338732  | 5.585854  |
| H | -2.796551 | 3.709186  | 4.916035  |
| H | -5.047200 | 2.951306  | 4.438778  |
| H | -5.105593 | 5.653124  | 0.244351  |
| H | -7.020523 | 2.877335  | 2.922057  |
| H | -7.015498 | 4.175569  | 0.805142  |
| H | -3.354135 | 8.106481  | 2.836524  |
| H | -3.881451 | 10.519375 | 3.069261  |
| H | -3.621343 | 11.027021 | -1.199257 |
| H | -3.157424 | 9.132357  | -2.628213 |
| H | -1.612670 | 6.739857  | -3.676499 |
| H | -2.837349 | 5.468568  | -3.338674 |
| H | -4.006007 | 11.978726 | 1.067019  |
| H | 1.096353  | 7.133051  | 1.499633  |
| H | 1.040328  | 5.660751  | 2.529990  |
| H | 0.338971  | 5.625647  | 0.875212  |
| H | -0.503642 | 4.795480  | -0.331388 |
| H | -1.225374 | 3.463373  | -1.299870 |
| H | -0.750039 | 5.003669  | -2.093536 |
| H | -4.643473 | -4.670284 | 2.345767  |
| H | -4.109588 | -3.019316 | 1.875156  |
| H | -5.798285 | -3.298617 | 2.432217  |

|   |           |           |           |
|---|-----------|-----------|-----------|
| H | -4.987951 | -7.991772 | 3.147963  |
| H | -5.089466 | -6.320852 | 2.490546  |
| H | -3.497334 | -7.009588 | 2.931783  |
| C | 4.704160  | 2.732610  | -1.239155 |
| C | 4.532676  | 2.541440  | 0.195429  |
| C | 6.092327  | 3.105012  | -1.481118 |
| C | 4.043800  | 1.905740  | -2.131134 |
| C | 5.814739  | 2.795763  | 0.840163  |
| C | 3.709355  | 1.533177  | 0.665636  |
| C | 6.778723  | 3.144078  | -0.196012 |
| C | 6.750117  | 2.631363  | -2.602822 |
| C | 3.176810  | 0.844068  | -1.635917 |
| C | 4.736433  | 1.407305  | -3.312702 |
| C | 6.208940  | 2.028816  | 1.922574  |
| C | 4.124017  | 0.725920  | 1.805902  |
| C | 3.013943  | 0.662618  | -0.273537 |
| C | 8.088241  | 2.707371  | -0.097431 |
| C | 6.054669  | 1.760620  | -3.542251 |
| C | 8.129385  | 2.171780  | -2.499110 |
| C | 3.333530  | -0.310567 | -2.511358 |
| C | 4.297494  | 0.037537  | -3.547665 |
| C | 5.341985  | 0.966899  | 2.417389  |
| C | 7.588179  | 1.569326  | 2.026689  |
| C | 3.683125  | -0.644124 | 1.572582  |
| C | 2.998712  | -0.682929 | 0.285875  |
| C | 8.503446  | 1.899718  | 1.042638  |
| C | 8.781130  | 2.208784  | -1.278821 |
| C | 7.004113  | 0.762924  | -4.019177 |
| C | 8.286338  | 1.017013  | -3.374459 |
| C | 3.319766  | -1.588353 | -1.980110 |
| C | 5.199081  | -0.909902 | -4.000162 |
| C | 6.185262  | -0.148670 | 2.827566  |
| C | 7.573571  | 0.223557  | 2.586102  |
| C | 4.486373  | -1.703357 | 1.959741  |
| C | 3.148428  | -1.779236 | -0.545336 |
| C | 9.452897  | 0.901940  | 0.565788  |
| C | 9.624519  | 1.092982  | -0.868918 |
| C | 6.587373  | -0.537801 | -4.242101 |
| C | 9.087022  | -0.042511 | -2.985195 |
| C | 4.268994  | -2.586384 | -2.457043 |
| C | 5.184384  | -2.255804 | -3.440869 |
| C | 5.768511  | -1.449338 | 2.604464  |
| C | 8.474834  | -0.723925 | 2.133127  |
| C | 4.643197  | -2.858366 | 1.084753  |
| C | 3.991716  | -2.895081 | -0.135622 |
| C | 9.438987  | -0.375928 | 1.096925  |
| C | 9.773423  | -0.003545 | -1.699988 |
| C | 7.430716  | -1.653681 | -3.832283 |
| C | 8.648181  | -1.412413 | -3.220073 |
| C | 4.684168  | -3.394178 | -1.317051 |
| C | 6.563683  | -2.715458 | -3.337090 |
| C | 6.717798  | -2.447335 | 2.127964  |
| C | 8.035967  | -2.093864 | 1.898239  |
| C | 6.022360  | -3.318082 | 1.188701  |
| C | 9.595927  | -1.530763 | 0.221670  |
| C | 9.758808  | -1.349370 | -1.140590 |
| C | 9.063350  | -2.220096 | -2.080056 |
| C | 5.993725  | -3.830489 | -1.218393 |
| C | 6.957870  | -3.482337 | -2.254631 |
| C | 8.728866  | -2.592523 | 0.716940  |
| C | 6.680151  | -3.791418 | 0.066868  |
| C | 8.240067  | -3.228203 | -1.609834 |
| C | 8.068421  | -3.419208 | -0.175063 |

## References:

---

**S1:** E. A. Johnson, *J. Chem. Soc.* **1957**, 4155-4156.

**S2:** B. Williamson, W. H. Rodebush, *J. Am. Chem. Soc.* **1941**, *63*, 3018–3025.

**S3:** A. S. Batsanov, J. C. Collings, I. J. S. Fairlamb, J. P. Holland, J. A. K. Howard, Z. Lin, T. B. Marder, A. C. Parsons, R. M. Ward, J. Zhu, *J. Org. Chem.* **2005**, *70*, 703-706.

**S4:** M. J. Frisch, G. W. Trucks, H. B. Schlegel, G. E. Scuseria, M. A. Robb, J. R. Cheeseman, J. A. Montgomery, Jr., T. Vreven, K. N. Kudin, J. C. Burant, J. M. Millam, S. S. Iyengar, J. Tomasi, V. Barone, B. Mennucci, M. Cossi, G. Scalmani, N. Rega, G. A. Petersson, H. Nakatsuji, M. Hada, M. Ehara, K. Toyota, R. Fukuda, J. Hasegawa, M. Ishida, T. Nakajima, Y. Honda, O. Kitao, H. Nakai, M. Klene, X. Li, J. E. Knox, H. P. Hratchian, J. B. Cross, C. Adamo, J. Jaramillo, R. Gomperts, R. E. Stratmann, O. Yazyev, A. J. Austin, R. Cammi, C. Pomelli, J. W. Ochterski, P. Y. Ayala, K. Morokuma, G. A. Voth, P. Salvador, J. J. Dannenberg, V. G. Zakrzewski, S. Dapprich, A. D. Daniels, M. C. Strain, O. Farkas, D. K. Malick, A. D. Rabuck, K. Raghavachari, J. B. Foresman, J. V. Ortiz, Q. Cui, A. G. Baboul, S. Clifford, J. Cioslowski, B. B. Stefanov, G. Liu, A. Liashenko, P. Piskorz, I. Komaromi, R. L. Martin, D. J. Fox, T. Keith, M. A. Al-Laham, C. Y. Peng, A. Nanayakkara, M. Challacombe, P. M. W. Gill, B. Johnson, W. Chen, M. W. Wong, C. Gonzalez, and J. A. Pople, *Gaussian 03, Revision B.02*, Gaussian, Inc., Pittsburgh PA, 2003.
